# Supplementary material for: Metal-free cyclization of unsaturated hydrazones for the divergent assembly of pyrazolones and pyrazolines
Source: Royal Society of Chemistry journal article supplement (doi:10.1039/c9cc04039k), 2019-01-01

## Supporting Information

*for*

### **Metal-free Cyclization of Unsaturated Hydrazones for the Divergent**

### **Assembly of Pyrazolones and Pyrazolines**

Xiaobing Liu,<sup>a</sup> Yao Zhou<sup>a</sup> and Qiuling Song\*<sup>a,b</sup>

<sup>a</sup> Institute of Next Generation Matter Transformation, College of Materials Science & Engineering and College of Chemical Engineering at Huaqiao University, 668 Jimei Blvd, Xiamen, Fujian, 361021, P. R. China

<sup>b</sup> Key Laboratory of Molecule Synthesis and Function Discovery, Fujian Province University, College of Chemistry at Fuzhou University, Fuzhou, Fujian, China, 350108

fax:86-592-6162990; email: qsong@hqu.edu.cn

## Table of Contents

|                                                                     |    |
|---------------------------------------------------------------------|----|
| 1. General information.....                                         | 3  |
| 2. General process for the synthesis of <b>2</b> and <b>3</b> ..... | 4  |
| 3. Crystal data of <b>2c</b> , <b>4</b> , <b>3f</b> .....           | 5  |
| 4. Characterization data for products.....                          | 8  |
| 5. NMR spectroscopic data.....                                      | 16 |

## 1. General information

All chemicals were purchased from Adamas Reagent, Ltd, Energy chemical company, J&K Scientific Ltd, Alfa Aesa chemical company and so forth. CH<sub>3</sub>CN was dried by CaH prior to use. Unless otherwise stated, all experiments were conducted in a 25 mL Schlenk reaction tube under O<sub>2</sub> or N<sub>2</sub> atmosphere. Reactions were monitored by TLC or GC-MS analysis. Flash column chromatography was performed over silica gel (200-300 mesh).

<sup>1</sup>H-NMR and <sup>13</sup>C-NMR spectra were recorded in CDCl<sub>3</sub> on a Bruker Avance 500 spectrometer (500 MHz <sup>1</sup>H, 125 MHz <sup>13</sup>C) at room temperature. Chemical shifts were reported in ppm on the scale relative to CDCl<sub>3</sub> ( $\delta = 7.26$  for <sup>1</sup>H-NMR,  $\delta = 77.00$  for <sup>13</sup>C-NMR) or DMSO-*d*<sub>6</sub> ( $\delta = 2.50$  for <sup>1</sup>H-NMR,  $\delta = 39.60$  for <sup>13</sup>C-NMR) as an internal reference. High resolution mass spectra were recorded using Q-TOF time-of-flight mass spectrometer. Coupling constants (*J*) were reported in Hertz (Hz).

The starting materials **1a-1u**, **2a'**, **2c'**, **2g'**, **2i'** were synthesized according to methods reported previous literatures.<sup>1,2</sup>

---

<sup>1</sup> M. Chen, L. Wang, P. Ren, X. Hou, Z. Fang, M. Han and W. Li, *Org. Lett.*, **2018**, *20*, 510.

<sup>2</sup> X. Peng, D. Wei, W. Han, F. Chen, W. Yu and B. Han, *ACS Catal.*, **2017**, *7*, 7830.

## 2. General procedure for the synthesis of 2 and 3

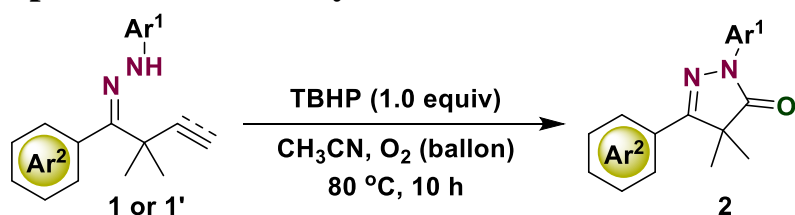

A mixture of  $\beta,\gamma$ -unsaturated hydrazone **1** or **1'** (0.2 mmol) and TBHP (40  $\mu$ L, 1.0 equiv, 5.0-6.0 mol/L in decane) in CH<sub>3</sub>CN (2 mL) was charged in a 25 mL Schlenk reaction tube. Then the Schlenk reaction tube was stirred at 80 °C under O<sub>2</sub> (1 atm, balloon) for 10 h. Upon completion of the reaction, the solvent was evaporated under reduced pressure and the residue was purified by flash column chromatograph to give the desired product **2**.

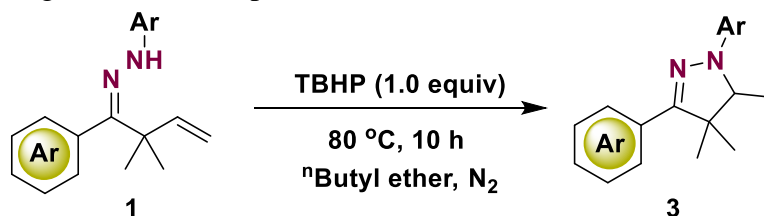

A mixture of  $\beta,\gamma$ -unsaturated hydrazone **1** (0.2 mmol) and TBHP (40  $\mu$ L, 1.0 equiv, 5.0-6.0 mol/L in decane) in <sup>n</sup>Butyl ether (2 mL) was charged in a 25 mL Schlenk reaction tube under N<sub>2</sub>. Then the Schlenk reaction tube was stirred at 80 °C for 10 h. Upon completion of the reaction, the solvent was evaporated under reduced pressure and the residue was purified by flash column chromatograph to give the desired product **3**.

### 3. Crystal data of 2c, 4, 3f

Crystallographic data for compound **2c** (CCDC-1916783) has been deposited with the Cambridge Crystallographic Data Centre, Copies of the data can be obtained, free of charge, on application to CCDC (Email:deposit@ccdc.cam.ac.uk).

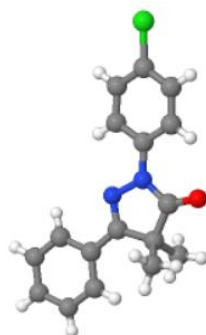

ORTEP view with ellipsoids (at the 30% probability level)

---

|                                         |                                  |                    |                |
|-----------------------------------------|----------------------------------|--------------------|----------------|
| Bond precision:                         | C-C = 0.0038 Å                   | Wavelength=0.71073 |                |
| Cell:                                   | a=5.9361 (7)                     | b=26.091 (3)       | c=10.7999 (11) |
|                                         | alpha=90                         | beta=98.444 (11)   | gamma=90       |
| Temperature:                            | 298 K                            |                    |                |
|                                         | Calculated                       | Reported           |                |
| Volume                                  | 1654.5 (3)                       | 1654.6 (3)         |                |
| Space group                             | P 21/n                           | P 1 21/n 1         |                |
| Hall group                              | -P 2yn                           | -P 2ybc (x-        |                |
| Moiety formula                          | C18 H17 N3 O4                    | C18 H17 N3 O4      |                |
| Sum formula                             | C18 H17 N3 O4                    | C18 H17 N3 O4      |                |
| Mr                                      | 339.35                           | 339.35             |                |
| Dx, g cm <sup>-3</sup>                  | 1.362                            | 1.362              |                |
| Z                                       | 4                                | 4                  |                |
| Mu (mm <sup>-1</sup> )                  | 0.098                            | 0.098              |                |
| F000                                    | 712.0                            | 712.4              |                |
| F000'                                   | 712.35                           |                    |                |
| h, k, lmax                              | 7, 31, 12                        | 7, 30, 12          |                |
| Nref                                    | 2905                             | 2898               |                |
| Tmin, Tmax                              |                                  | 0.501, 1.000       |                |
| Tmin'                                   |                                  |                    |                |
| Correction method= # Reported T Limits: | Tmin=0.501 Tmax=1.000            |                    |                |
| AbsCorr = MULTI-SCAN                    |                                  |                    |                |
| Data completeness= 0.998                | Theta(max)= 25.000               |                    |                |
| R(reflections)= 0.0591 ( 2078)          | wR2(reflections)= 0.1542 ( 2898) |                    |                |
| S = 1.083                               | Npar= 229                        |                    |                |

---

Crystallographic data for compound **4** (CCDC-1876777) has been deposited with the Cambridge Crystallographic Data Centre. Copies of the data can be obtained, free of charge, on application to CCDC (Email:deposit@ccdc.cam.ac.uk).

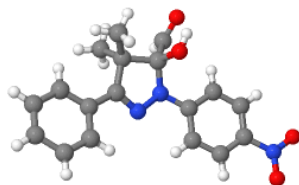

ORTEP view with ellipsoids (at the 30% probability level)

---

|                                                               |                |                                  |                |
|---------------------------------------------------------------|----------------|----------------------------------|----------------|
| Bond precision:                                               | C-C = 0.0038 Å | Wavelength=0.71073               |                |
| Cell:                                                         | a=5.9361 (7)   | b=26.091 (3)                     | c=10.7999 (11) |
|                                                               | alpha=90       | beta=98.444 (11)                 | gamma=90       |
| Temperature:                                                  | 298 K          |                                  |                |
|                                                               | Calculated     | Reported                         |                |
| Volume                                                        | 1654.5 (3)     | 1654.6 (3)                       |                |
| Space group                                                   | P 21/n         | P 1 21/n 1                       |                |
| Hall group                                                    | -P 2yn         | -P 2ybc (x-                      |                |
| Moiety formula                                                | C18 H17 N3 O4  | C18 H17 N3 O4                    |                |
| Sum formula                                                   | C18 H17 N3 O4  | C18 H17 N3 O4                    |                |
| Mr                                                            | 339.35         | 339.35                           |                |
| Dx, g cm <sup>-3</sup>                                        | 1.362          | 1.362                            |                |
| Z                                                             | 4              | 4                                |                |
| Mu (mm <sup>-1</sup> )                                        | 0.098          | 0.098                            |                |
| F000                                                          | 712.0          | 712.4                            |                |
| F000'                                                         | 712.35         |                                  |                |
| h, k, lmax                                                    | 7, 31, 12      | 7, 30, 12                        |                |
| Nref                                                          | 2905           | 2898                             |                |
| Tmin, Tmax                                                    |                | 0.501, 1.000                     |                |
| Tmin'                                                         |                |                                  |                |
| Correction method= # Reported T Limits: Tmin=0.501 Tmax=1.000 |                |                                  |                |
| AbsCorr = MULTI-SCAN                                          |                |                                  |                |
| Data completeness=                                            | 0.998          | Theta (max)= 25.000              |                |
| R(reflections)=                                               | 0.0591 ( 2078) | wR2(reflections)= 0.1542 ( 2898) |                |
| S =                                                           | 1.083          | Npar= 229                        |                |

---

Crystallographic data for compound **3f** (CCDC-1916788) has been deposited with the Cambridge Crystallographic Data Centre, Copies of the data can be obtained, free of charge, on application to CCDC (Email:deposit@ccdc.cam.ac.uk).

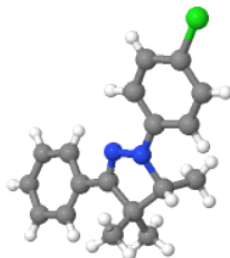

ORTEP view with ellipsoids (at the 30% probability level)

---

|                                                               |                |                                 |               |
|---------------------------------------------------------------|----------------|---------------------------------|---------------|
| Bond precision:                                               | C-C = 0.0052 A | Wavelength=0.71073              |               |
| Cell:                                                         | a=8.2526(9)    | b=9.1103(10)                    | c=21.0646(18) |
|                                                               | alpha=90       | beta=90                         | gamma=90      |
| Temperature:                                                  | 293 K          |                                 |               |
|                                                               | Calculated     | Reported                        |               |
| Volume                                                        | 1583.7(3)      | 1583.7(3)                       |               |
| Space group                                                   | P 21 21 21     | P 21 21 21                      |               |
| Hall group                                                    | P 2ac 2ab      | P 2ac 2ab                       |               |
| Moiety formula                                                | C18 H19 Cl N2  | C18 H19 Cl N2                   |               |
| Sum formula                                                   | C18 H19 Cl N2  | C18 H19 Cl N2                   |               |
| Mr                                                            | 298.80         | 298.80                          |               |
| Dx, g cm <sup>-3</sup>                                        | 1.253          | 1.253                           |               |
| Z                                                             | 4              | 4                               |               |
| Mu (mm <sup>-1</sup> )                                        | 0.236          | 0.236                           |               |
| F000                                                          | 632.0          | 632.0                           |               |
| F000'                                                         | 632.78         |                                 |               |
| h, k, lmax                                                    | 11, 12, 28     | 11, 12, 28                      |               |
| Nref                                                          | 4320[ 2475]    | 3381                            |               |
| Tmin, Tmax                                                    | 0.972, 0.977   | 0.951, 1.000                    |               |
| Tmin'                                                         | 0.972          |                                 |               |
| Correction method= # Reported T Limits: Tmin=0.951 Tmax=1.000 |                |                                 |               |
| AbsCorr = MULTI-SCAN                                          |                |                                 |               |
| Data completeness=                                            | 1.37/0.78      | Theta(max) = 29.259             |               |
| R(reflections)=                                               | 0.0608( 2179)  | wR2(reflections)= 0.1062( 3381) |               |
| S =                                                           | 1.010          | Npar= 193                       |               |

---

## 4. Characterization data for products

### 4,4-dimethyl-2,5-diphenyl-2,4-dihydro-3H-pyrazol-3-one (2a)

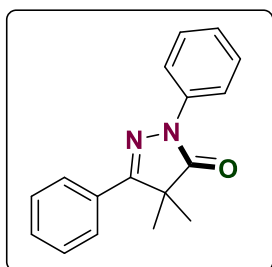

The reaction was performed following the general procedure. The residue was purified by flash column chromatograph (silica gel, petroleum ether:AcOEt = 20:1, v/v) to give the product as a pale yellow oil (44.8 mg, 85%). <sup>1</sup>H NMR (500 MHz, CDCl<sub>3</sub>) δ 8.09 (d, *J* = 7.8 Hz, 2H), 7.95 (dd, *J* = 6.7, 3.0 Hz, 2H), 7.53 – 7.43 (m, 5H), 7.25 (t, *J* = 7.4 Hz, 1H), 1.64 (s, 6H). <sup>13</sup>C NMR (125 MHz, CDCl<sub>3</sub>) δ 177.3, 162.4, 138.3, 130.7, 130.4, 128.9, 128.9, 126.6, 125.2, 118.9, 49.9, 23.0. HRMS (ESI, m/z) calcd for C<sub>17</sub>H<sub>17</sub>N<sub>2</sub>O [M+H]<sup>+</sup>: 265.1335; found: 265.1338.

### 2-(4-fluorophenyl)-4,4-dimethyl-5-phenyl-2,4-dihydro-3H-pyrazol-3-one (2b)

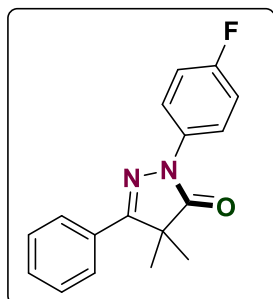

The reaction was performed following the general procedure. The residue was purified by flash column chromatograph (silica gel, petroleum ether:AcOEt = 20:1, v/v) to give the product as a pale yellow oil (36.7 mg, 65%). <sup>1</sup>H NMR (500 MHz, CDCl<sub>3</sub>) δ 8.09 – 8.01 (m, 2H), 7.96 – 7.90 (m, 2H), 7.53 – 7.47 (m, 3H), 7.18 – 7.11 (m, 2H), 1.63 (s, 6H). <sup>13</sup>C NMR (125 MHz, CDCl<sub>3</sub>) δ 177.1, 162.6, 160.0 (*J* = 243.8 Hz), 134.4 (*J* = 2.5 Hz), 130.6, 130.5, 128.9, 126.6, 120.6 (*J* = 7.5 Hz), 115.6 (*J* = 22.5 Hz), 49.9, 23.0. HRMS (ESI, m/z) calcd for C<sub>17</sub>H<sub>16</sub>FN<sub>2</sub>O [M+H]<sup>+</sup>: 283.1241; found: 283.1240.

### 2-(4-chlorophenyl)-4,4-dimethyl-5-phenyl-2,4-dihydro-3H-pyrazol-3-one (2c)

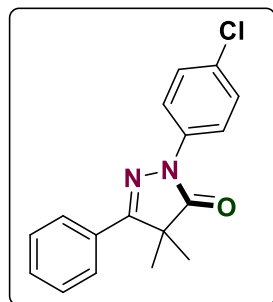

The reaction was performed following the general procedure. The residue was purified by flash column chromatograph (silica gel, petroleum ether:AcOEt = 20:1, v/v) to give the product as a white solid (49.8 mg, 83%). <sup>1</sup>H NMR (500 MHz, CDCl<sub>3</sub>) δ 8.08 – 8.02 (m, 2H), 7.91 – 7.87 (m, 2H), 7.50 – 7.43 (m, 4H), 7.25 (tt, *J* = 7.2, 1.2 Hz, 1H), 1.62 (s, 6H). <sup>13</sup>C NMR (125 MHz, CDCl<sub>3</sub>) δ 177.1, 161.3, 138.1, 136.4, 129.2, 129.1, 128.9, 127.8, 125.3, 118.9, 49.7, 22.3. HRMS (ESI, m/z) calcd for C<sub>17</sub>H<sub>16</sub>ClN<sub>2</sub>O [M+H]<sup>+</sup>: 299.0946; found: 299.0947.

### 2-(4-bromophenyl)-4,4-dimethyl-5-phenyl-2,4-dihydro-3H-pyrazol-3-one (2d)

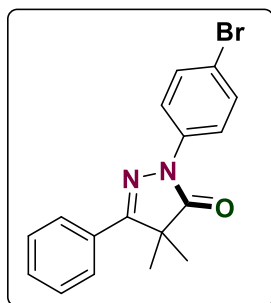

The reaction was performed following the general procedure. The residue was purified by flash column chromatograph (silica gel, petroleum ether:AcOEt = 20:1, v/v) to give the product as a white solid (47.6 mg, 70%). <sup>1</sup>H NMR (500 MHz, CDCl<sub>3</sub>) δ 8.04 – 7.98 (m, 2H), 7.93 (ddd, *J* = 6.9, 2.8, 1.5 Hz, 2H), 7.60 – 7.54 (m, 2H), 7.53 – 7.47 (m, 3H), 1.63 (s, 6H). <sup>13</sup>C NMR (125 MHz, CDCl<sub>3</sub>) δ 177.3, 162.7, 137.4, 131.9, 130.6, 130.5, 128.9, 126.6, 120.3, 118.0, 50.0, 23.0. HRMS (ESI, m/z) calcd for C<sub>17</sub>H<sub>16</sub>BrN<sub>2</sub>O [M+H]<sup>+</sup>: 343.0441; found:



343.0442.

#### 4,4-dimethyl-5-phenyl-2-(4-(trifluoromethyl)phenyl)-2,4-dihydro-3H-pyrazol-3-one (2e)

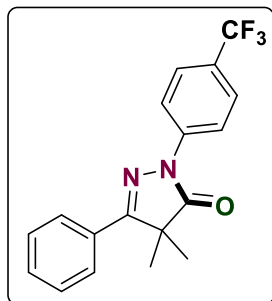

The reaction was performed following the general procedure. The residue was purified by flash column chromatograph (silica gel, petroleum ether:AcOEt = 15:1, v/v) to give the product as a white solid (46.2 mg, 70%). <sup>1</sup>H NMR (500 MHz, CDCl<sub>3</sub>) δ 8.29 – 8.22 (m, 2H), 7.99 – 7.92 (m, 2H), 7.74 – 7.69 (m, 2H), 7.52 (tt, *J* = 3.8, 2.8 Hz, 3H), 1.65 (s, 6H). <sup>13</sup>C NMR (126 MHz, CDCl<sub>3</sub>) δ 177.6, 163.0, 141.0, 130.7, 130.4, 129.0, 126.7, 126.6 (q, *J* = 32.5 Hz), 126.1 (q, *J* = 3.8 Hz), 124.2 (q, *J* = 270.0 Hz), 118.4, 50.1, 23.0. <sup>19</sup>F NMR (470 MHz, CDCl<sub>3</sub>) δ -62.1. HRMS (ESI, m/z) calcd for C<sub>18</sub>H<sub>16</sub>F<sub>3</sub>N<sub>2</sub>O [M+H]<sup>+</sup>: 333.1209; found: 333.1211.

#### 4,4-dimethyl-2-(4-nitrophenyl)-5-phenyl-2,4-dihydro-3H-pyrazol-3-one (2f)

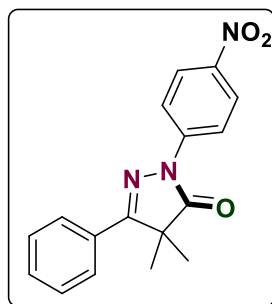

The reaction was performed following the general procedure. The residue was purified by flash column chromatograph (silica gel, petroleum ether:AcOEt = 5:1, v/v) to give the product as a yellow solid 31.6 mg, 69%). <sup>1</sup>H NMR (500 MHz, Chloroform-*d*) δ 8.33 (s, 4H), 8.00 – 7.92 (m, 2H), 7.53 (qd, *J* = 4.4, 1.5 Hz, 3H), 1.67 (s, 6H). <sup>13</sup>C NMR (125 MHz, CDCl<sub>3</sub>) δ 177.8, 163.6, 144.0, 143.3, 131.0, 130.1, 129.1, 126.8, 124.9, 118.2, 50.2, 23.1. HRMS (ESI, m/z) calcd for C<sub>17</sub>H<sub>16</sub>N<sub>3</sub>O [M+H]<sup>+</sup>: 310.1186; found: 310.1188.

#### 4,4-dimethyl-5-phenyl-2-(p-tolyl)-2,4-dihydro-3H-pyrazol-3-one (2g)

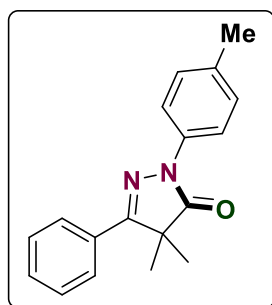

The reaction was performed following the general procedure. The residue was purified by flash column chromatograph (silica gel, petroleum ether:AcOEt = 20:1, v/v) to give the product as a pale yellow oil (25.6 mg, 46%). <sup>1</sup>H NMR (500 MHz, CDCl<sub>3</sub>) δ 7.99 – 7.87 (m, 4H), 7.52 – 7.46 (m, 3H), 7.26 (dd, *J* = 7.7, 1.3 Hz, 2H), 2.40 (s, 3H), 1.63 (s, 6H). <sup>13</sup>C NMR (125 MHz, CDCl<sub>3</sub>) δ 177.2, 162.2, 135.9, 134.8, 130.8, 130.3, 129.4, 128.9, 126.6, 119.0, 49.8, 23.0, 21.0. HRMS (ESI, m/z) calcd for C<sub>18</sub>H<sub>19</sub>N<sub>2</sub>O [M+H]<sup>+</sup>: 279.1492; found: 279.1498.

#### 4,4-dimethyl-2-(naphthalen-2-yl)-5-phenyl-2,4-dihydro-3H-pyrazol-3-one (2h)

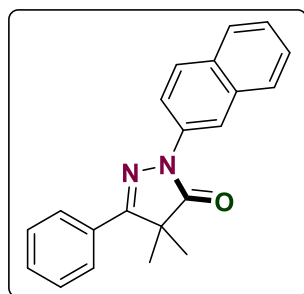

The reaction was performed following the general procedure. The residue was purified by flash column chromatograph (silica gel, petroleum ether:AcOEt = 20:1, v/v) to give the product as a pale yellow oil (44.0 mg, 69%). <sup>1</sup>H NMR (500 MHz, CDCl<sub>3</sub>) δ 8.56 (d, *J* = 2.2 Hz, 1H), 8.28 (dd, *J* = 8.9, 2.2 Hz, 1H), 8.03 – 7.97 (m, 2H), 7.94 (t, *J* = 9.1 Hz, 2H), 7.87 (d, *J* = 8.1 Hz, 1H), 7.55 – 7.46 (m, 5H), 1.68 (s, 6H). <sup>13</sup>C NMR (125 MHz, CDCl<sub>3</sub>) δ 177.6, 162.6, 135.9, 133.6, 131.1, 130.7, 130.5, 128.9, 128.8,

128.1, 127.7, 126.7, 126.5, 125.4, 118.5, 116.1, 50.0, 23.1. HRMS (ESI, m/z) calcd for C<sub>21</sub>H<sub>19</sub>N<sub>2</sub>O [M+H]<sup>+</sup>: 315.1492; found: 315.1490.

### 2-(3-bromophenyl)-4,4-dimethyl-5-phenyl-2,4-dihydro-3H-pyrazol-3-one (2i)

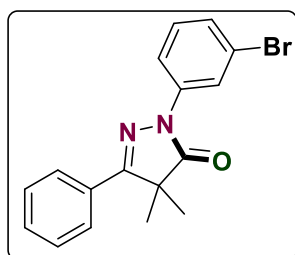

The reaction was performed following the general procedure. The residue was purified by flash column chromatograph (silica gel, petroleum ether:AcOEt = 20:1, v/v) to give the product as a white solid (34.2 mg, 50%). <sup>1</sup>H NMR (500 MHz, CDCl<sub>3</sub>) δ 8.28 (t, *J* = 2.0 Hz, 1H), 8.09 (dt, *J* = 8.0, 1.6 Hz, 1H), 7.98 – 7.92 (m, 2H), 7.51 (q, *J* = 3.2, 2.6 Hz, 3H), 7.40 – 7.30 (m, 2H), 1.63 (s, 6H). <sup>13</sup>C NMR (125 MHz, CDCl<sub>3</sub>) δ 177.4, 162.7, 139.4, 130.6, 130.4, 130.3, 129.0,

128.0, 126.7, 122.6, 121.6, 117.1, 50.0, 23.0. HRMS (ESI, m/z) calcd for C<sub>17</sub>H<sub>16</sub>BrN<sub>2</sub>O [M+H]<sup>+</sup>: 343.0441; found: 343.0443.

### 2-(3-chlorophenyl)-4,4-dimethyl-5-phenyl-2,4-dihydro-3H-pyrazol-3-one (2j)

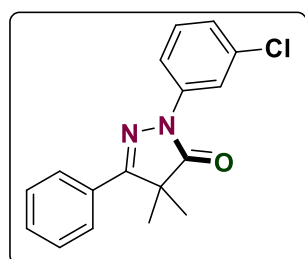

The reaction was performed following the general procedure. The residue was purified by flash column chromatograph (silica gel, petroleum ether:AcOEt = 20:1, v/v) to give the product as a white solid (44.8 mg, 75%). <sup>1</sup>H NMR (500 MHz, CDCl<sub>3</sub>) δ 8.14 (t, *J* = 2.1 Hz, 1H), 8.05 (ddd, *J* = 8.3, 2.1, 1.0 Hz, 1H), 7.96 – 7.93 (m, 2H), 7.50 (dp, *J* = 4.9, 1.8 Hz, 3H), 7.38 (t, *J* = 8.1 Hz, 1H), 7.21 (ddd, *J* = 8.0, 2.1, 1.0 Hz, 1H), 1.63 (s, 6H). <sup>13</sup>C NMR (125 MHz, CDCl<sub>3</sub>) δ 177.4, 162.7, 139.3, 134.7, 130.6, 130.4, 130.0, 129.0, 126.7, 125.0, 118.8,

116.6, 50.0, 23.0. HRMS (ESI, m/z) calcd for C<sub>17</sub>H<sub>16</sub>ClN<sub>2</sub>O [M+H]<sup>+</sup>: 299.0946; found: 299.0944.

### 2-(2,4-difluorophenyl)-4,4-dimethyl-5-phenyl-2,4-dihydro-3H-pyrazol-3-one (2k)

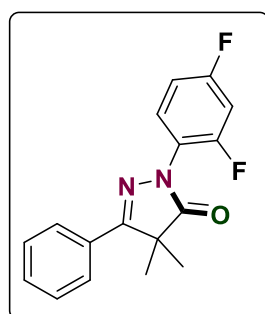

The reaction was performed following the general procedure. The residue was purified by flash column chromatograph (silica gel, petroleum ether:AcOEt = 15:1, v/v) to give the product as a pale yellow oil (26.4 mg, 44%). <sup>1</sup>H NMR (500 MHz, CDCl<sub>3</sub>) δ 7.88 – 7.83 (m, 2H), 7.52 (tdd, *J* = 8.4, 5.9, 0.9 Hz, 1H), 7.47 – 7.43 (m, 3H), 7.01 – 6.95 (m, 2H), 1.63 (s, 6H). <sup>13</sup>C NMR (125 MHz, CDCl<sub>3</sub>) δ 177.7, 163.2, 160.1 (dd, *J* = 250.0, 10.0 Hz), 157.1 (dd, *J* = 255.0, 12.5 Hz), 130.5, 130.4, 128.9, 128.4 (dd, *J* = 10.0, 2.5 Hz), 126.5, 121.3 (dd, *J* = 12.5, 3.8 Hz), 111.6 (dd, *J* = 22.5, 3.8 Hz), 105.2 (dd, *J* = 26.3, 23.8 Hz), 48.4, 22.8. <sup>19</sup>F NMR (470 MHz, CDCl<sub>3</sub>) δ -109.1 (d, *J* = 7.9 Hz), -114.1 (d, *J* = 7.5 Hz). HRMS (ESI, m/z) calcd for C<sub>17</sub>H<sub>15</sub>F<sub>2</sub>N<sub>2</sub>O [M+H]<sup>+</sup>: 301.1147; found: 301.1149.

### 2-(3,5-dimethylphenyl)-4,4-dimethyl-5-phenyl-2,4-dihydro-3H-pyrazol-3-one (2l)

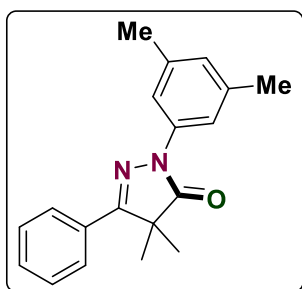

The reaction was performed following the general procedure. The residue was purified by flash column chromatograph (silica gel, petroleum ether:AcOEt = 20:1, v/v) to give the product as a pale yellow oil (31.2 mg, 53%).  $^1\text{H}$  NMR (500 MHz,  $\text{CDCl}_3$ )  $\delta$  7.98 – 7.92 (m, 2H), 7.70 (d,  $J$  = 1.5 Hz, 2H), 7.49 (dd,  $J$  = 5.2, 2.0 Hz, 3H), 6.92 – 6.85 (m, 1H), 2.40 (s, 6H), 1.62 (s, 6H).  $^{13}\text{C}$  NMR (125 MHz,  $\text{CDCl}_3$ )  $\delta$  177.3, 162.3, 138.6, 138.1, 130.8, 130.3, 128.9, 127.0, 126.6, 116.8, 49.9, 23.0, 21.6. HRMS (ESI,  $m/z$ )

calcd for  $\text{C}_{19}\text{H}_{21}\text{N}_2\text{O}$   $[\text{M}+\text{H}]^+$ : 293.1648; found: 293.1650.

### 5-(4-isopropylphenyl)-4,4-dimethyl-2-phenyl-2,4-dihydro-3H-pyrazol-3-one (2m)

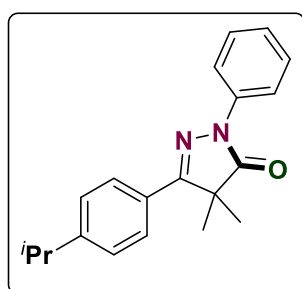

The reaction was performed following the general procedure. The residue was purified by flash column chromatograph (silica gel, petroleum ether:AcOEt = 20:1, v/v) to give the product as pale yellow oil (33.6 mg, 55%).  $^1\text{H}$  NMR (500 MHz,  $\text{CDCl}_3$ )  $\delta$  8.14 – 8.05 (m, 2H), 7.92 – 7.86 (m, 2H), 7.51 – 7.43 (m, 2H), 7.39 – 7.33 (m, 2H), 7.27 – 7.20 (m, 1H), 2.99 (hept,  $J$  = 6.8 Hz, 1H), 1.63 (s, 6H), 1.33 (s, 3H), 1.31 (s, 3H).  $^{13}\text{C}$  NMR (125 MHz,  $\text{CDCl}_3$ )  $\delta$  177.4, 162.4, 151.6, 138.4, 128.9, 128.3, 127.0, 126.7,

125.1, 118.9, 49.9, 34.1, 23.8, 23.1. HRMS (ESI,  $m/z$ ) calcd for  $\text{C}_{20}\text{H}_{23}\text{N}_2\text{O}$   $[\text{M}+\text{H}]^+$ : 307.1805; found: 307.1807.

### 5-(4-methoxyphenyl)-4,4-dimethyl-2-phenyl-2,4-dihydro-3H-pyrazol-3-one (2n)

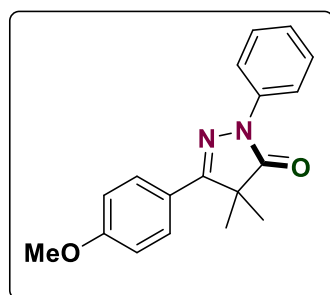

The reaction was performed following the general procedure. The residue was purified by flash column chromatograph (silica gel, petroleum ether:AcOEt = 15:1, v/v) to give the product as pale yellow oil (37.6 mg, 69%).  $^1\text{H}$  NMR (500 MHz,  $\text{CDCl}_3$ )  $\delta$  8.13 – 8.05 (m, 2H), 7.94 – 7.87 (m, 2H), 7.50 – 7.41 (m, 2H), 7.26 – 7.19 (m, 1H), 7.04 – 6.95 (m, 2H), 3.90 (s, 3H), 1.62 (s, 6H).  $^{13}\text{C}$  NMR (125 MHz,  $\text{CDCl}_3$ )  $\delta$  177.3, 162.2, 161.3, 138.4, 128.9, 128.2, 125.0, 123.4, 118.9, 114.3, 55.4, 49.9, 23.1.

HRMS (ESI,  $m/z$ ) calcd for  $\text{C}_{18}\text{H}_{18}\text{N}_2\text{NaO}_2$   $[\text{M}+\text{Na}]^+$ : 317.1260; found: 317.1265.

### 5-([1,1'-biphenyl]-4-yl)-4,4-dimethyl-2-phenyl-2,4-dihydro-3H-pyrazol-3-one (2o)

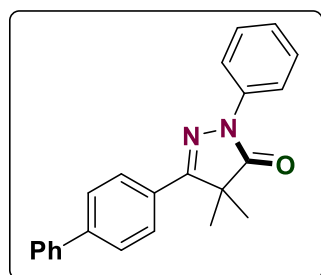

The reaction was performed following the general procedure. The residue was purified by flash column chromatograph (silica gel, petroleum ether:AcOEt = 20:1, v/v) to give the product as a white solid (32.2 mg, 47%).  $^1\text{H}$  NMR (500 MHz,  $\text{CDCl}_3$ )  $\delta$  8.10 (ddd,  $J$  = 8.9, 2.6, 1.3 Hz, 2H), 8.07 – 7.96 (m, 2H), 7.77 – 7.70 (m, 2H), 7.70 – 7.61 (m, 2H), 7.50 (ddd,  $J$  = 15.2, 8.6, 7.3 Hz, 4H), 7.45 – 7.38 (m, 1H), 7.26 (ddd,  $J$  = 8.7, 6.8, 1.3 Hz, 1H), 1.67 (s,

6H).  $^{13}\text{C}$  NMR (125 MHz,  $\text{CDCl}_3$ )  $\delta$  177.4, 162.0, 143.1, 140.1, 138.3, 129.5, 129.0,

128.9, 128.0, 127.5, 127.1, 127.0, 125.2, 119.0, 49.9, 23.1. HRMS (ESI, m/z) calcd for C<sub>23</sub>H<sub>21</sub>N<sub>2</sub>O [M+H]<sup>+</sup>: 341.1648; found: 333.1249.

#### 4,4-dimethyl-2-phenyl-5-(m-tolyl)-2,4-dihydro-3H-pyrazol-3-one (2p)

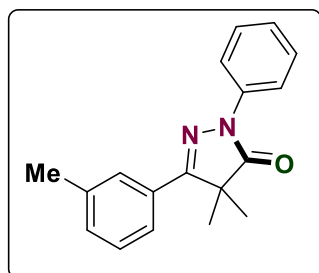

The reaction was performed following the general procedure. The residue was purified by flash column chromatograph (silica gel, petroleum ether:AcOEt = 20:1, v/v) to give the product as a pale yellow oil (37.2 mg, 69%). <sup>1</sup>H NMR (500 MHz, CDCl<sub>3</sub>) δ 8.09 (dt, *J* = 8.0, 1.1 Hz, 2H), 7.79 (d, *J* = 1.8 Hz, 1H), 7.71 (d, *J* = 7.7 Hz, 1H), 7.50 – 7.44 (m, 2H), 7.38 (t, *J* = 7.7 Hz, 1H), 7.32 – 7.29 (m, 1H), 7.25 (td, *J* = 7.4, 1.1 Hz, 1H), 2.46 (s, 3H), 1.63 (d, *J* = 0.8 Hz, 6H). <sup>13</sup>C NMR (125 MHz, CDCl<sub>3</sub>) δ 177.4, 162.6, 138.7, 138.3, 131.2, 130.7, 128.9, 128.7, 127.2, 125.2, 123.8, 119.0, 50.0, 23.1, 21.6. HRMS (ESI, m/z) calcd for C<sub>18</sub>H<sub>19</sub>N<sub>2</sub>O [M+H]<sup>+</sup>: 279.1492; found: 279.1495.

#### 5-(3-methoxyphenyl)-4,4-dimethyl-2-phenyl-2,4-dihydro-3H-pyrazol-3-one (2q)

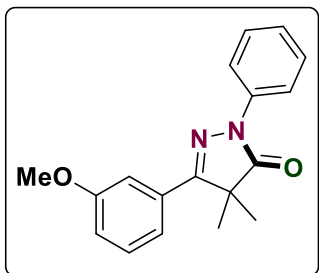

The reaction was performed following the general procedure. The residue was purified by flash column chromatograph (silica gel, petroleum ether:AcOEt = 15:1, v/v) to give the product as a pale yellow oil (35.9 mg, 69%). <sup>1</sup>H NMR (500 MHz, CDCl<sub>3</sub>) δ 8.12 – 8.02 (m, 2H), 7.52 (dd, *J* = 2.6, 1.6 Hz, 1H), 7.51 – 7.43 (m, 3H), 7.41 (t, *J* = 8.0 Hz, 1H), 7.25 (tt, *J* = 7.3, 1.2 Hz, 1H), 7.04 (ddd, *J* = 8.2, 2.7, 1.0 Hz, 1H), 3.91 (s, 3H), 1.63 (s, 6H). <sup>13</sup>C NMR (125 MHz, CDCl<sub>3</sub>) δ 177.4, 162.2, 159.9, 138.2, 132.0, 129.9, 128.9, 125.2, 119.1, 119.0, 116.0, 112.0, 55.4, 49.9, 23.1. HRMS (ESI, m/z) calcd for C<sub>18</sub>H<sub>19</sub>N<sub>2</sub>O<sub>2</sub> [M+H]<sup>+</sup>: 295.1441; found: 295.1440.

#### 4,4-dimethyl-2-phenyl-5-(4-(trifluoromethyl)phenyl)-2,4-dihydro-3H-pyrazol-3-one (2r)

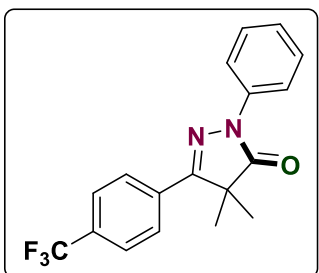

The reaction was performed following the general procedure. The residue was purified by flash column chromatograph (silica gel, petroleum ether:AcOEt = 20:1, v/v) to give the product as a pale yellow oil (45.2 mg, 68%). <sup>1</sup>H NMR (500 MHz, CDCl<sub>3</sub>) δ 8.11 – 8.01 (m, 4H), 7.75 (d, *J* = 8.2 Hz, 2H), 7.52 – 7.44 (m, 2H), 7.29 – 7.24 (m, 1H), 1.64 (s, 6H). <sup>13</sup>C NMR (125 MHz, CDCl<sub>3</sub>) δ 177.1, 160.9, 138.0, 134.0, 131.9 (q, *J* = 32.5 Hz), 129.0, 126.8, 125.9 (q, *J* = 3.8 Hz), 125.5, 123.8 (q, *J* = 270.0 Hz), 119.0, 49.68, 22.89. <sup>19</sup>F NMR (470 MHz, CDCl<sub>3</sub>) δ -62.9. HRMS (ESI, m/z) calcd for C<sub>18</sub>H<sub>16</sub>F<sub>3</sub>N<sub>2</sub>O [M+H]<sup>+</sup>: 333.1209; found: 333.1212.

### 5-(3-fluorophenyl)-4,4-dimethyl-2-phenyl-2,4-dihydro-3H-pyrazol-3-one (2s)

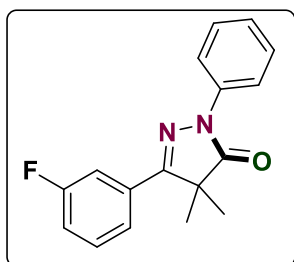

The reaction was performed following the general procedure. The residue was purified by flash column chromatograph (silica gel, petroleum ether:AcOEt = 20:1, v/v) to give the product as a pale yellow oil (32.2 mg, 57%). <sup>1</sup>H NMR (500 MHz, CDCl<sub>3</sub>) δ 8.10 – 8.02 (m, 2H), 7.72 – 7.65 (m, 2H), 7.50 – 7.42 (m, 3H), 7.28 – 7.22 (m, 1H), 7.19 (tdd, *J* = 8.3, 2.5, 1.0 Hz, 1H), 1.63 (s, 6H). <sup>13</sup>C NMR (125 MHz, CDCl<sub>3</sub>) δ 177.2, 163.0 (d, *J* = 245.0 Hz), 161.2 (d, *J* = 3.1 Hz), 138.1, 132.8 (d, *J* = 7.9 Hz), 130.5 (d, *J* = 7.5 Hz), 129.0, 125.3, 122.2 (d, *J* = 2.5 Hz), 118.9, 117.4 (d, *J* = 21.3 Hz), 113.4 (d, *J* = 23.2 Hz), 49.7, 23.0. <sup>19</sup>F NMR (470 MHz, CDCl<sub>3</sub>) δ -111.5.

### 5-(4-chlorophenyl)-4,4-dimethyl-2-phenyl-2,4-dihydro-3H-pyrazol-3-one (2t)

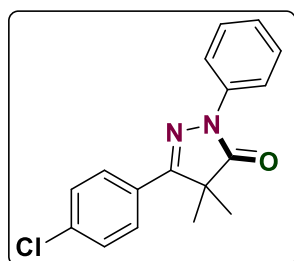

The reaction was performed following the general procedure. The residue was purified by flash column chromatograph (silica gel, petroleum ether:AcOEt = 20:1, v/v) to give the product as a white solid (43.8 mg, 73%). <sup>1</sup>H NMR (500 MHz, CDCl<sub>3</sub>) δ 8.08 – 8.03 (m, 2H), 7.96 – 7.91 (m, 2H), 7.52 – 7.48 (m, 3H), 7.44 – 7.40 (m, 2H), 1.63 (s, 6H). <sup>13</sup>C NMR (125 MHz, CDCl<sub>3</sub>) δ 177.3, 162.7, 136.9, 130.6, 130.5, 130.2, 128.9, 126.6, 120.0, 50.0, 23.0. HRMS (ESI, m/z) calcd for C<sub>17</sub>H<sub>16</sub>ClN<sub>2</sub>O [M+H]<sup>+</sup>: 299.0946; found: 299.0949.

### 4,4-dimethyl-2-phenyl-5-(thiophen-2-yl)-2,4-dihydro-3H-pyrazol-3-one (2u)

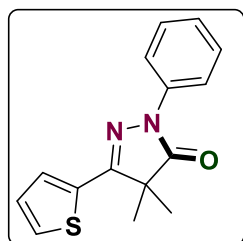

The reaction was performed following the general procedure. The residue was purified by flash column chromatograph (silica gel, petroleum ether:AcOEt = 20:1, v/v) to give the product as a pale yellow oil (31.3 mg, 58%). <sup>1</sup>H NMR (500 MHz, CDCl<sub>3</sub>) δ 8.08 – 7.95 (m, 2H), 7.51 (dd, *J* = 3.7, 1.1 Hz, 1H), 7.49 – 7.43 (m, 3H), 7.23 (tt, *J* = 7.3, 1.2 Hz, 1H), 7.15 (dd, *J* = 5.1, 3.7 Hz, 1H), 1.62 (s, 6H). <sup>13</sup>C NMR (125 MHz, CDCl<sub>3</sub>) δ 176.7, 158.7, 138.1, 134.2, 128.9, 128.3, 127.7, 127.3, 125.2, 118.9, 50.0, 23.1. HRMS (ESI, m/z) calcd for C<sub>15</sub>H<sub>15</sub>N<sub>2</sub>OS [M+H]<sup>+</sup>: 271.0900; found: 271.0903.

### 4,4,5-trimethyl-1,3-diphenyl-4,5-dihydro-1H-pyrazole (3a)

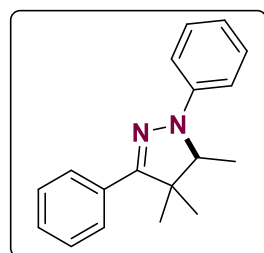

The reaction was performed following the general procedure. The residue was purified by flash column chromatograph (silica gel, petroleum ether:AcOEt = 20:1, v/v) to give the product as a pale yellow oil (41.7 mg, 79%). <sup>1</sup>H NMR (500 MHz, CDCl<sub>3</sub>) δ 7.86 – 7.79 (m, 2H), 7.47 – 7.39 (m, 2H), 7.40 – 7.32 (m, 3H), 7.27 – 7.22 (m, 2H), 6.92 (tt, *J* = 7.2, 1.2 Hz, 1H), 3.96 (q, *J* = 6.5 Hz, 1H), 1.47 (s, 3H), 1.42 (s, 3H), 1.21 (d, *J* = 6.4 Hz, 3H). <sup>13</sup>C NMR (125 MHz, CDCl<sub>3</sub>) δ 155.1, 144.9, 133.0, 129.1, 128.4, 128.2, 126.7, 119.6, 115.0, 68.0, 50.0, 26.4, 19.4, 11.9. HRMS (ESI, m/z) calcd for C<sub>18</sub>H<sub>21</sub>N<sub>2</sub> [M+H]<sup>+</sup>: 265.1699; found: 265.1701

### 4,4,5-trimethyl-1-phenyl-3-(4-(trifluoromethyl)phenyl)-4,5-dihydro-1H-pyrazole (3b)

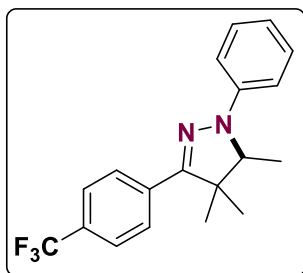

The reaction was performed following the general procedure. The residue was purified by flash column chromatograph (silica gel, petroleum ether:AcOEt = 20:1, v/v) to give the product as a pale yellow oil (41.8 mg, 63%).  $^1\text{H}$  NMR (500 MHz,  $\text{CDCl}_3$ )  $\delta$  7.97 – 7.87 (m, 2H), 7.65 (d,  $J$  = 8.2 Hz, 2H), 7.39 – 7.32 (m, 2H), 7.27 – 7.21 (m, 2H), 6.98 – 6.90 (m, 1H), 4.01 (q,  $J$  = 6.5 Hz, 1H), 1.46 (s, 3H), 1.43 (s, 3H), 1.21 (d,  $J$  = 6.5 Hz, 3H).  $^{13}\text{C}$  NMR (125 MHz,  $\text{CDCl}_3$ )  $\delta$  153.1, 144.3, 136.5, 129.6 (q,  $J$  = 32.5 Hz), 129.1, 127.5, 126.6, 125.3 (q,  $J$  = 3.8 Hz), 123.2, 120.2, 115.1, 68.2, 49.5, 26.4, 19.3, 11.9.  $^{19}\text{F}$  NMR (470 MHz,  $\text{CDCl}_3$ )  $\delta$  -62.9. HRMS (ESI,  $m/z$ ) calcd for  $\text{C}_{19}\text{H}_{20}\text{F}_3\text{N}_2$   $[\text{M}+\text{H}]^+$ : 333.1573; found: 333.1573.

### 3-(4-methoxyphenyl)-4,4,5-trimethyl-1-phenyl-4,5-dihydro-1H-pyrazole (3c)

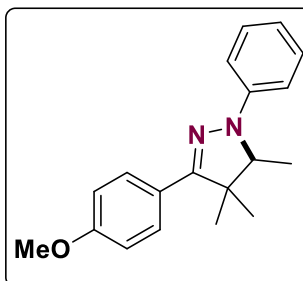

The reaction was performed following the general procedure. The residue was purified by flash column chromatograph (silica gel, petroleum ether:AcOEt = 20:1, v/v) to give the product as a pale yellow oil (38.8 mg, 66%).  $^1\text{H}$  NMR (500 MHz,  $\text{CDCl}_3$ )  $\delta$  7.78 – 7.70 (m, 2H), 7.36 – 7.29 (m, 2H), 7.23 – 7.18 (m, 2H), 6.98 – 6.91 (m, 2H), 6.89 (tt,  $J$  = 7.3, 1.2 Hz, 1H), 3.90 (q,  $J$  = 6.5 Hz, 1H), 3.87 (s, 3H), 1.43 (s, 3H), 1.39 (s, 3H), 1.19 (d,  $J$  = 6.5 Hz, 3H).  $^{13}\text{C}$  NMR (125 MHz,  $\text{CDCl}_3$ )  $\delta$  159.7, 155.1, 145.1, 129.0, 128.1, 125.5, 119.4, 114.9, 113.8, 67.8, 55.3, 49.8, 26.4, 19.5, 11.9. HRMS (ESI,  $m/z$ ) calcd for  $\text{C}_{19}\text{H}_{23}\text{N}_2\text{O}$   $[\text{M}+\text{H}]^+$ : 295.1805; found: 295.1808.

### 3-(3-methoxyphenyl)-4,4,5-trimethyl-1-phenyl-4,5-dihydro-1H-pyrazole (3d)

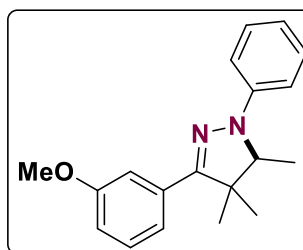

The reaction was performed following the general procedure. The residue was purified by flash column chromatograph (silica gel, petroleum ether:AcOEt = 20:1, v/v) to give the product as a white solid (44.7 mg, 76%).  $^1\text{H}$  NMR (500 MHz,  $\text{CDCl}_3$ )  $\delta$  7.37 (dt,  $J$  = 7.5, 1.6 Hz, 2H), 7.35 – 7.30 (m, 3H), 7.26 – 7.19 (m, 2H), 6.97 – 6.86 (m, 2H), 3.95 (q,  $J$  = 6.5 Hz, 1H), 3.89 (s, 3H), 1.45 (s, 3H), 1.41 (s, 3H), 1.20 (d,  $J$  = 6.5 Hz, 3H).  $^{13}\text{C}$  NMR (125 MHz,  $\text{CDCl}_3$ )  $\delta$  159.5, 154.9, 144.8, 134.3, 129.3, 129.1, 119.6, 119.2, 115.0, 114.0, 112.2, 68.0, 55.3, 49.8, 26.5, 19.4, 11.9. HRMS (ESI,  $m/z$ ) calcd for  $\text{C}_{19}\text{H}_{23}\text{N}_2\text{O}$   $[\text{M}+\text{H}]^+$ : 295.1805; found: 295.1808.

### 3-(4-isopropylphenyl)-4,4,5-trimethyl-1-phenyl-4,5-dihydro-1H-pyrazole (3e)

The reaction was performed following the general procedure. The residue was purified by flash column chromatograph (silica gel, petroleum ether:AcOEt = 20:1, v/v) to give the product as a white solid (50.6 mg, 83%). <sup>1</sup>H NMR (500 MHz, CDCl<sub>3</sub>) δ 7.77 – 7.72 (m, 2H), 7.36 – 7.31 (m, 2H), 7.30 – 7.27 (m, 2H), 7.24 – 7.20 (m, 2H), 6.94 – 6.86 (m, 1H), 3.94 (q, *J* = 6.5 Hz, 1H), 2.97 (hept, *J* = 7.0 Hz, 1H), 1.45 (s, 3H), 1.42 (s, 3H), 1.32 (s, 3H), 1.30 (s, 3H), 1.20 (d, *J* = 6.4 Hz, 3H). <sup>13</sup>C NMR (125 MHz, CDCl<sub>3</sub>) δ 155.2, 149.1, 145.0, 130.4, 129.0, 126.7, 126.5, 119.4, 114.9, 67.8, 49.8, 34.0, 26.5, 23.0, 23.9, 19.4, 11.9. HRMS (ESI, *m/z*) calcd for C<sub>21</sub>H<sub>27</sub>N<sub>2</sub> [M+H]<sup>+</sup>: 307.2169; found: 307.2167.

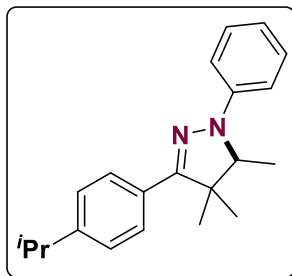

### 1-(4-chlorophenyl)-4,4,5-trimethyl-3-phenyl-4,5-dihydro-1H-pyrazole (3f)

The reaction was performed following the general procedure. The residue was purified by flash column chromatograph (silica gel, petroleum ether:AcOEt = 20:1, v/v) to give the product as a white solid (40.8 mg, 68%). <sup>1</sup>H NMR (500 MHz, CDCl<sub>3</sub>) δ 7.81 – 7.76 (m, 2H), 7.47 – 7.33 (m, 3H), 7.30 – 7.25 (m, 2H), 7.17 – 7.11 (m, 2H), 3.91 (q, *J* = 6.5 Hz, 1H), 1.45 (s, 3H), 1.40 (s, 3H), 1.17 (d, *J* = 6.4 Hz, 3H). <sup>13</sup>C NMR (125 MHz, CDCl<sub>3</sub>) δ 155.7, 143.5, 132.6, 128.9, 128.4, 126.8, 124.3, 116.0, 68.0, 50.0, 26.4, 19.4, 11.8. HRMS (ESI, *m/z*) calcd for C<sub>18</sub>H<sub>20</sub>ClN<sub>2</sub> [M+H]<sup>+</sup>: 299.1310; found: 299.1311.

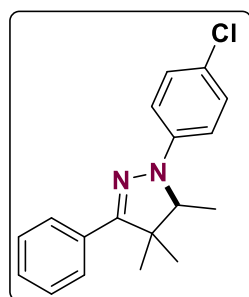

### 1-(4-bromophenyl)-4,4,5-trimethyl-3-phenyl-4,5-dihydro-1H-pyrazole (3g)

The reaction was performed following the general procedure. The residue was purified by flash column chromatograph (silica gel, petroleum ether:AcOEt = 20:1, v/v) to give the product as a white solid (40.8 mg, 60%). <sup>1</sup>H NMR (500 MHz, CDCl<sub>3</sub>) δ 7.80 – 7.75 (m, 2H), 7.40 (dq, *J* = 8.4, 6.9 Hz, 5H), 7.11 – 7.06 (m, 2H), 3.92 (q, *J* = 6.5 Hz, 1H), 1.45 (s, 3H), 1.40 (s, 3H), 1.16 (d, *J* = 6.5 Hz, 3H). <sup>13</sup>C NMR (125 MHz, CDCl<sub>3</sub>) δ 155.7, 143.8, 132.6, 131.8, 128.5, 128.4, 126.8, 116.3, 111.5, 67.8, 50.0, 26.5, 19.4, 11.8. HRMS (ESI, *m/z*) calcd for C<sub>18</sub>H<sub>20</sub>BrN<sub>2</sub> [M+H]<sup>+</sup>: 343.0804; found: 343.0804.

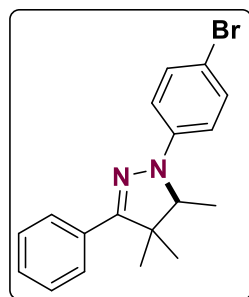

## 5. NMR spectroscopic data

### 4,4-dimethyl-2,5-diphenyl-2,4-dihydro-3H-pyrazol-3-one (2a)

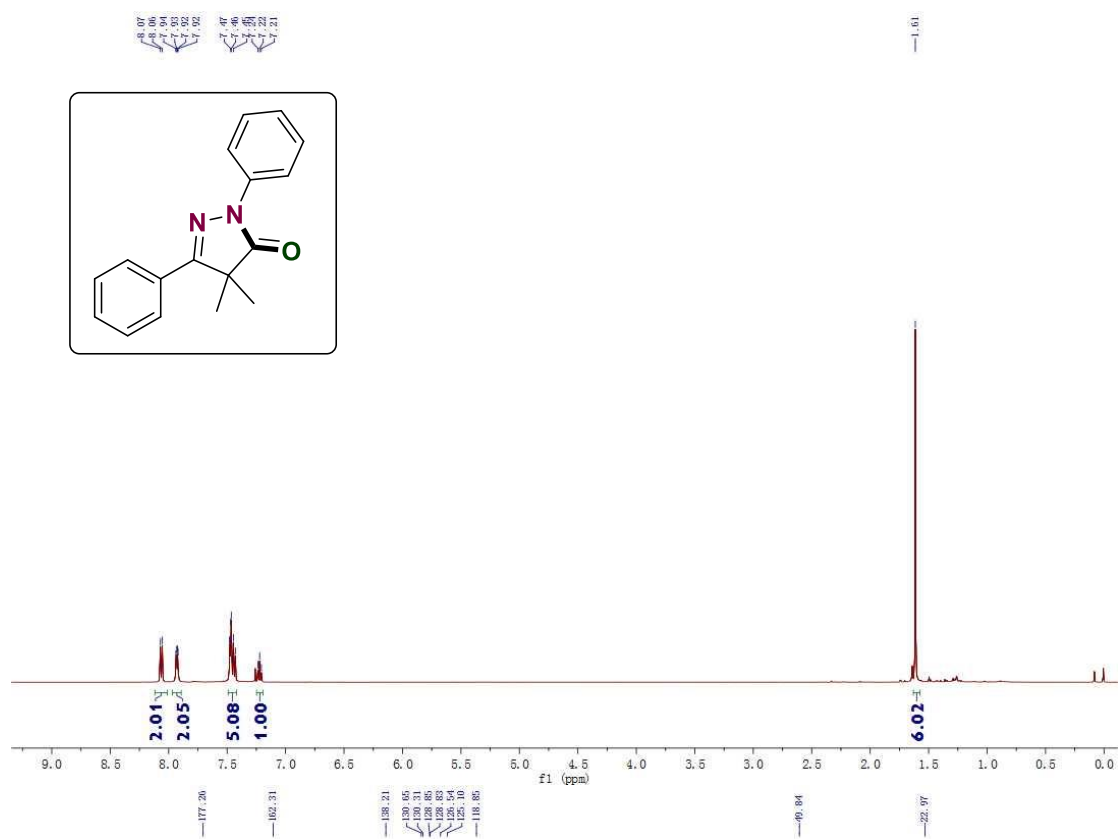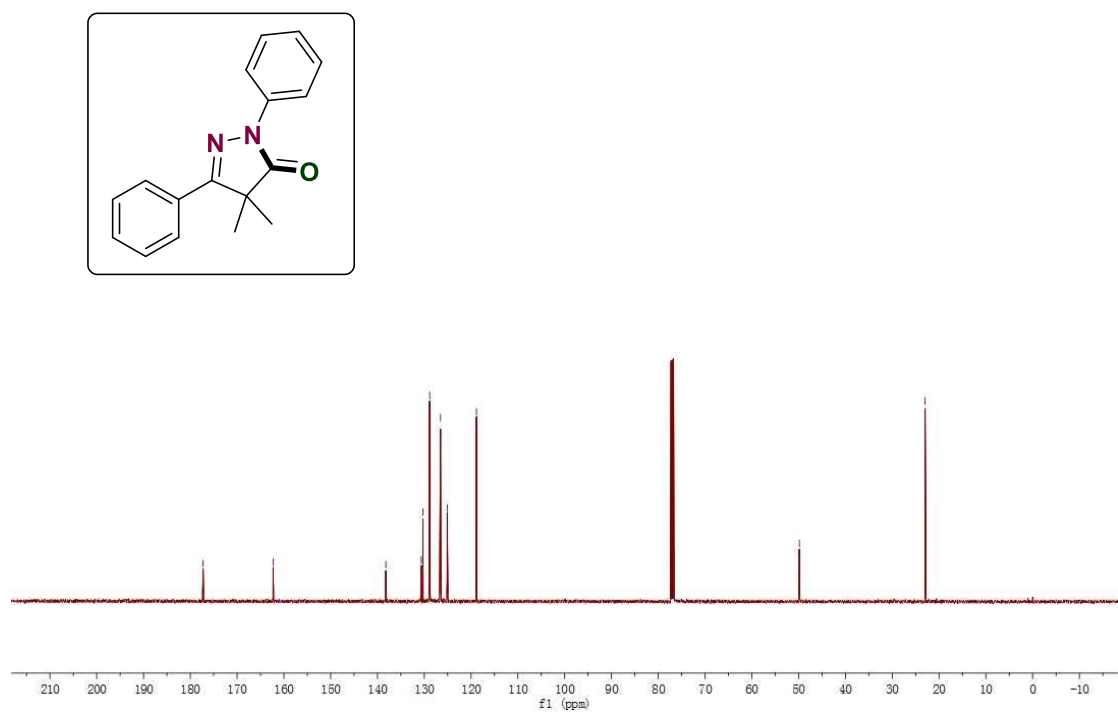



**2-(4-fluorophenyl)-4,4-dimethyl-5-phenyl-2,4-dihydro-3H-pyrazol-3-one (2b)**

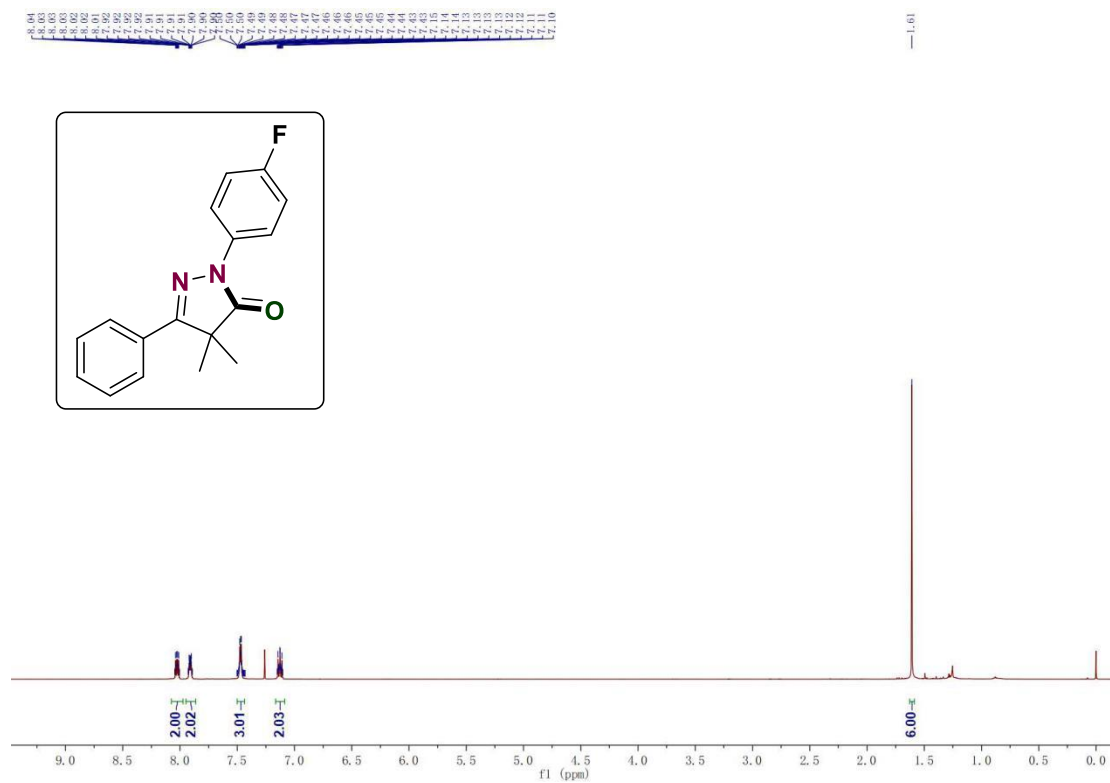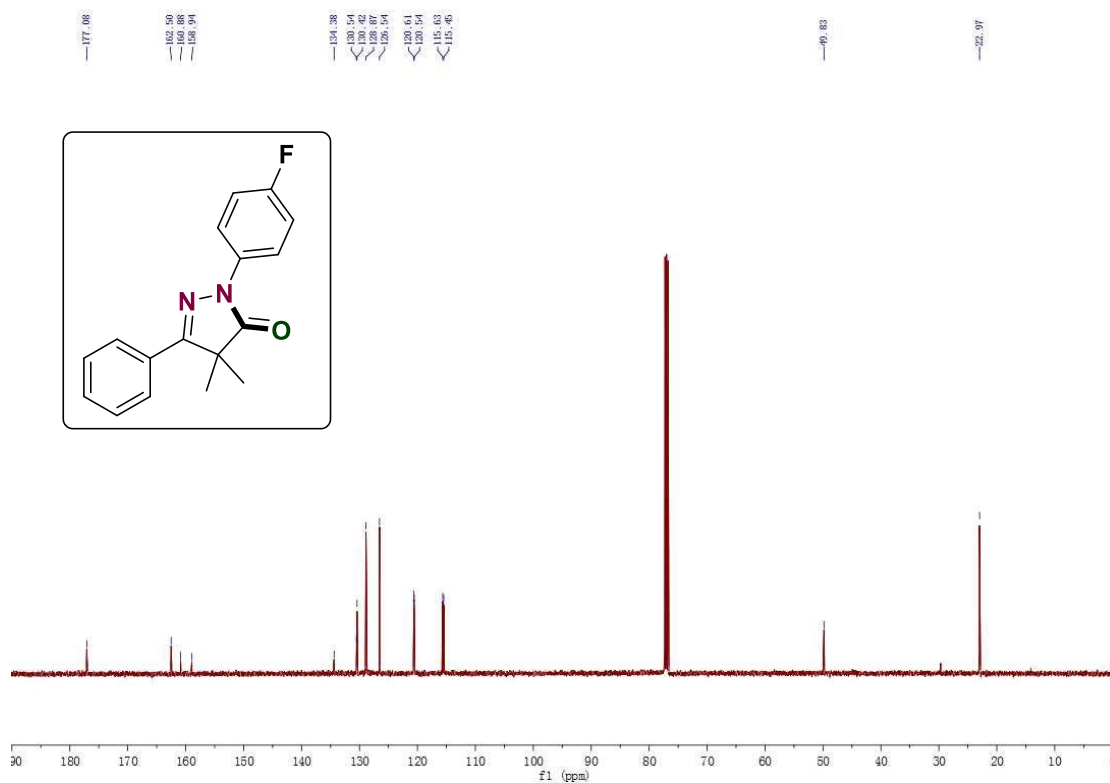

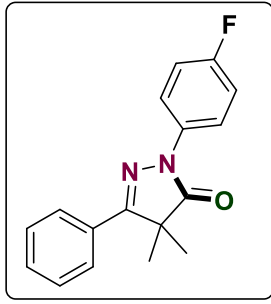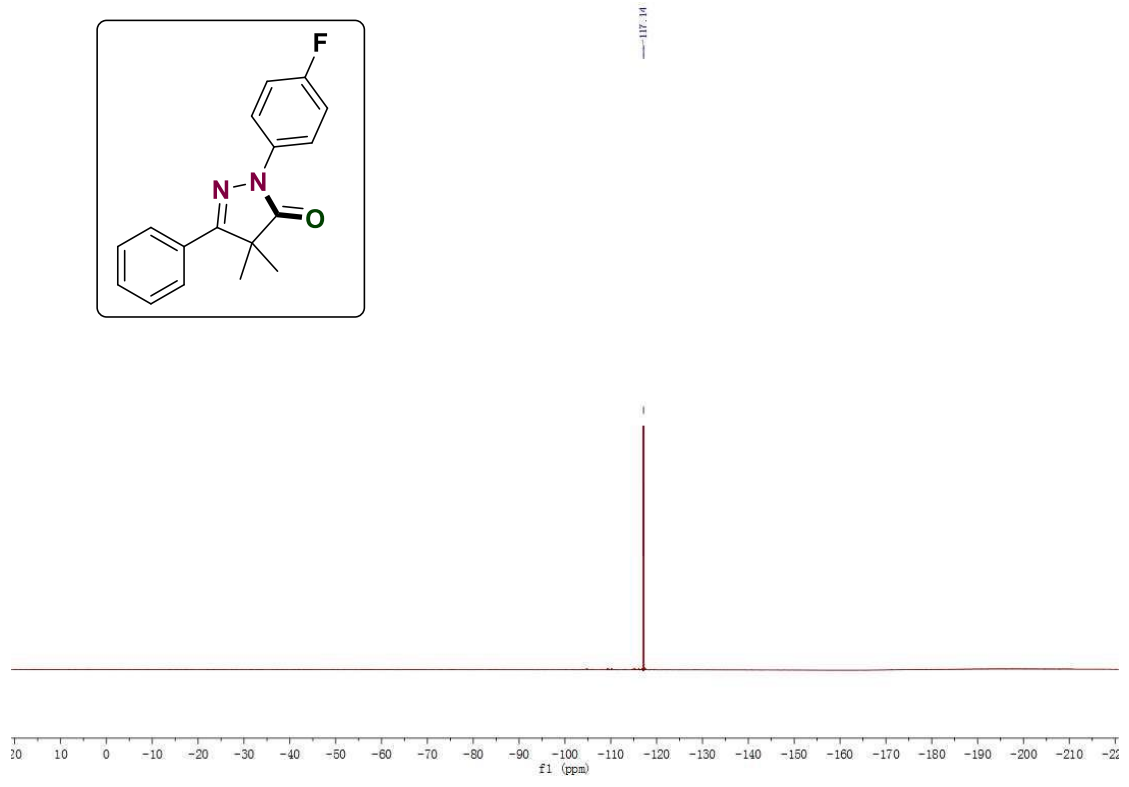

## 2-(4-chlorophenyl)-4,4-dimethyl-5-phenyl-2,4-dihydro-3H-pyrazol-3-one (2c)

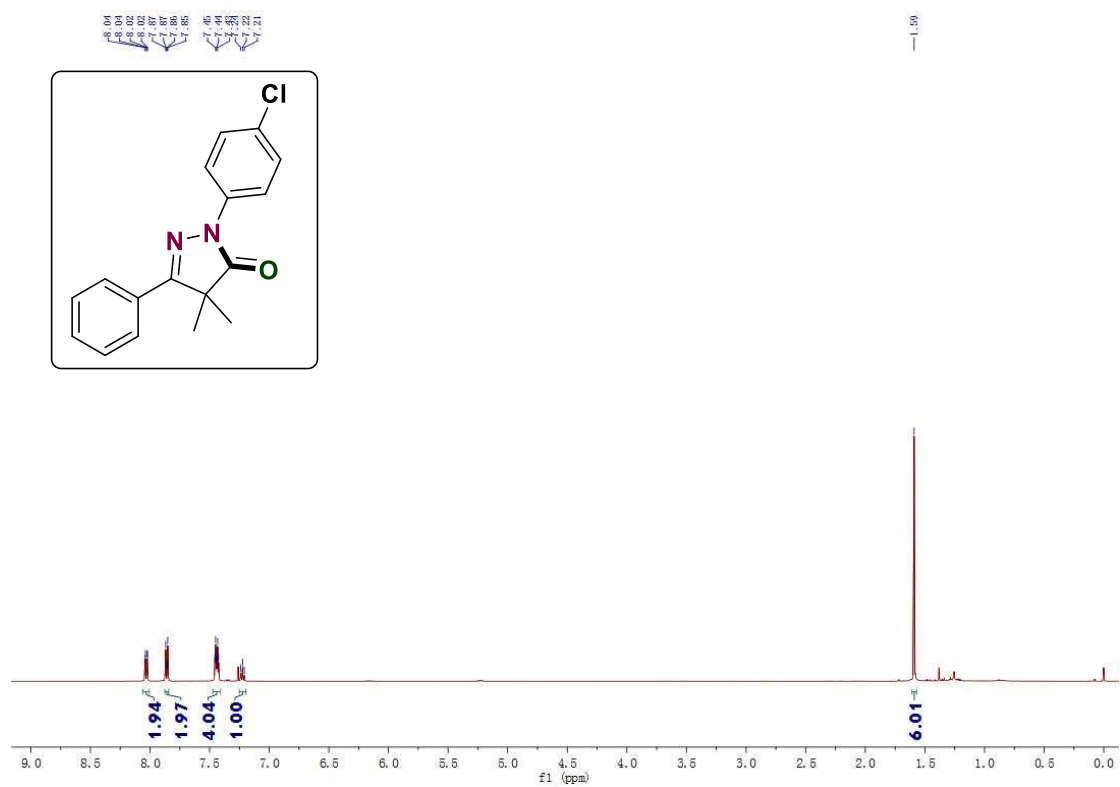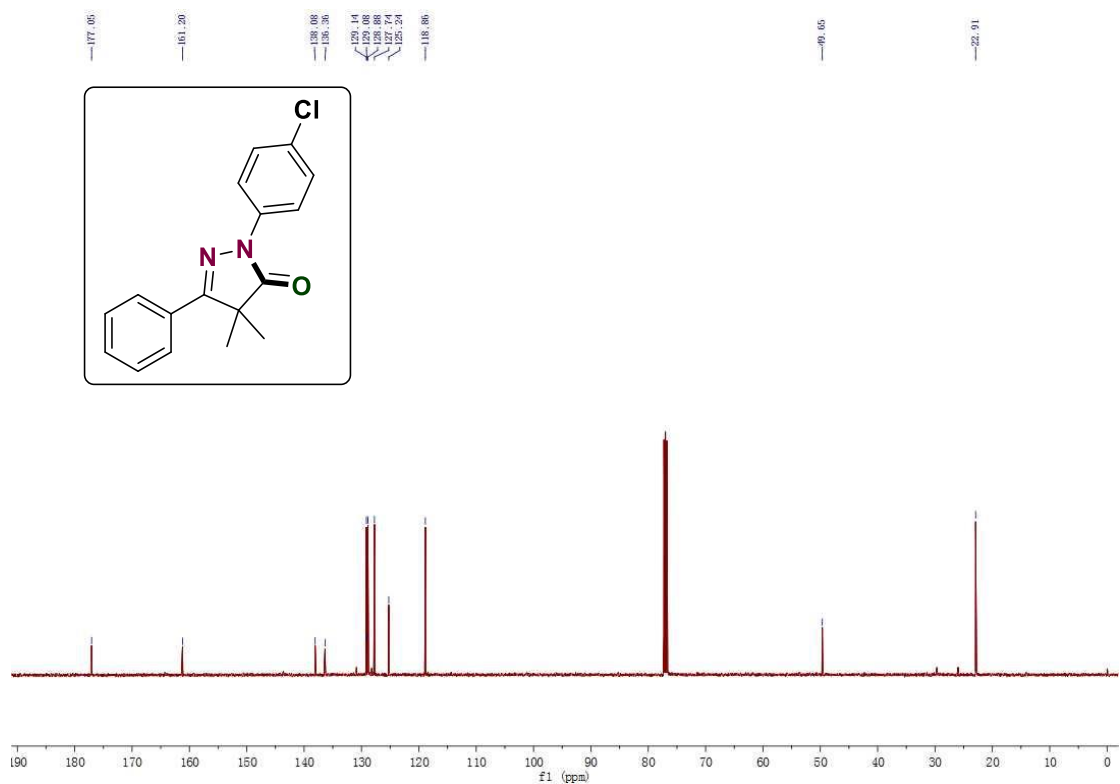

## 2-(4-bromophenyl)-4,4-dimethyl-5-phenyl-2,4-dihydro-3H-pyrazol-3-one (2d)

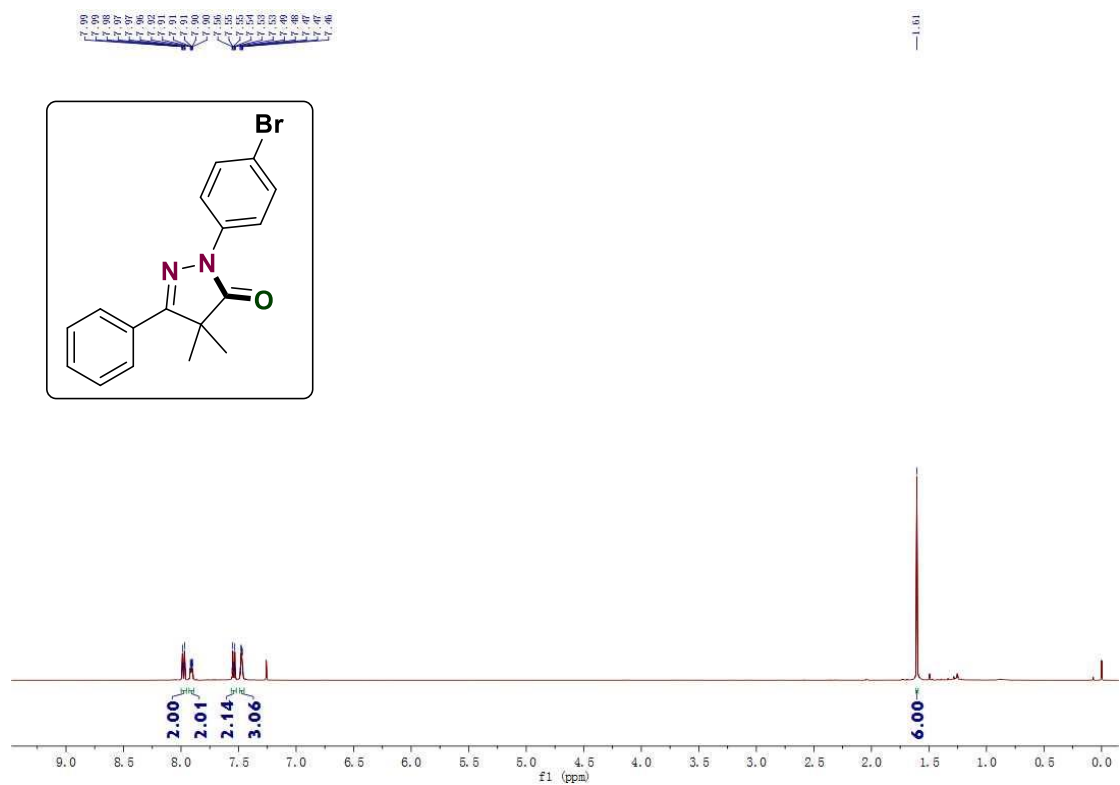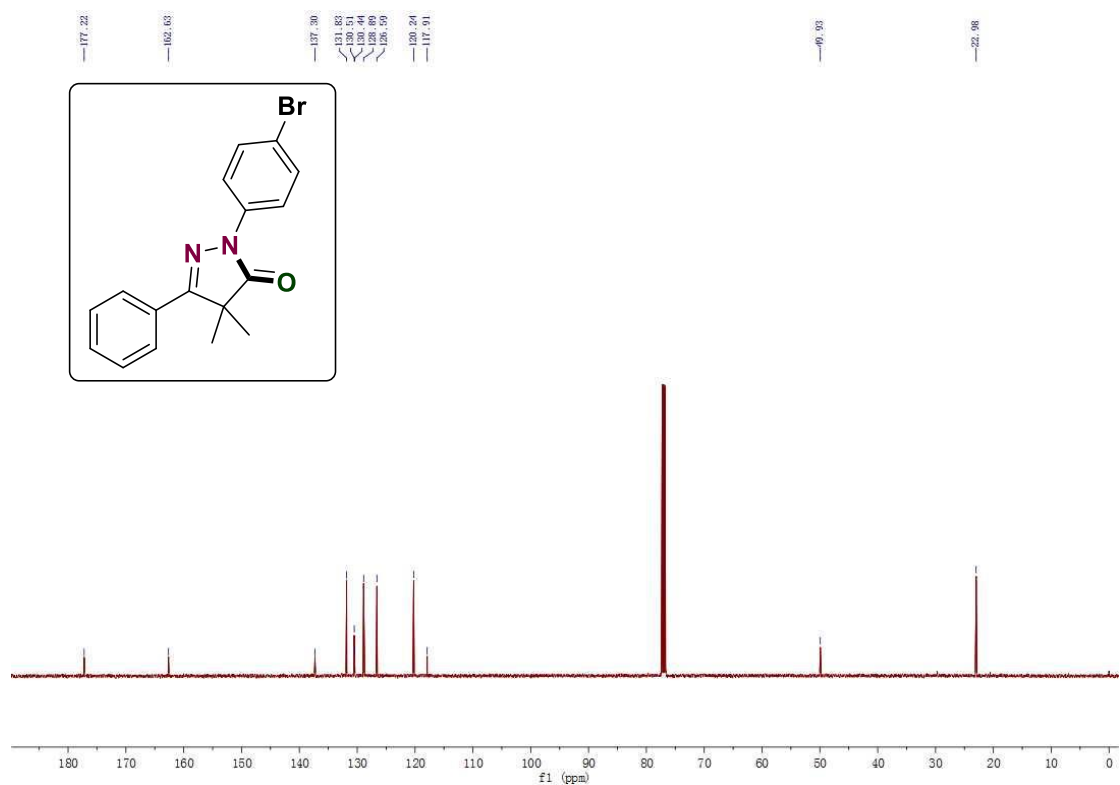

# 4,4-dimethyl-5-phenyl-2-(4-(trifluoromethyl)phenyl)-2,4-dihydro-3H-pyrazol-3-one (2e)

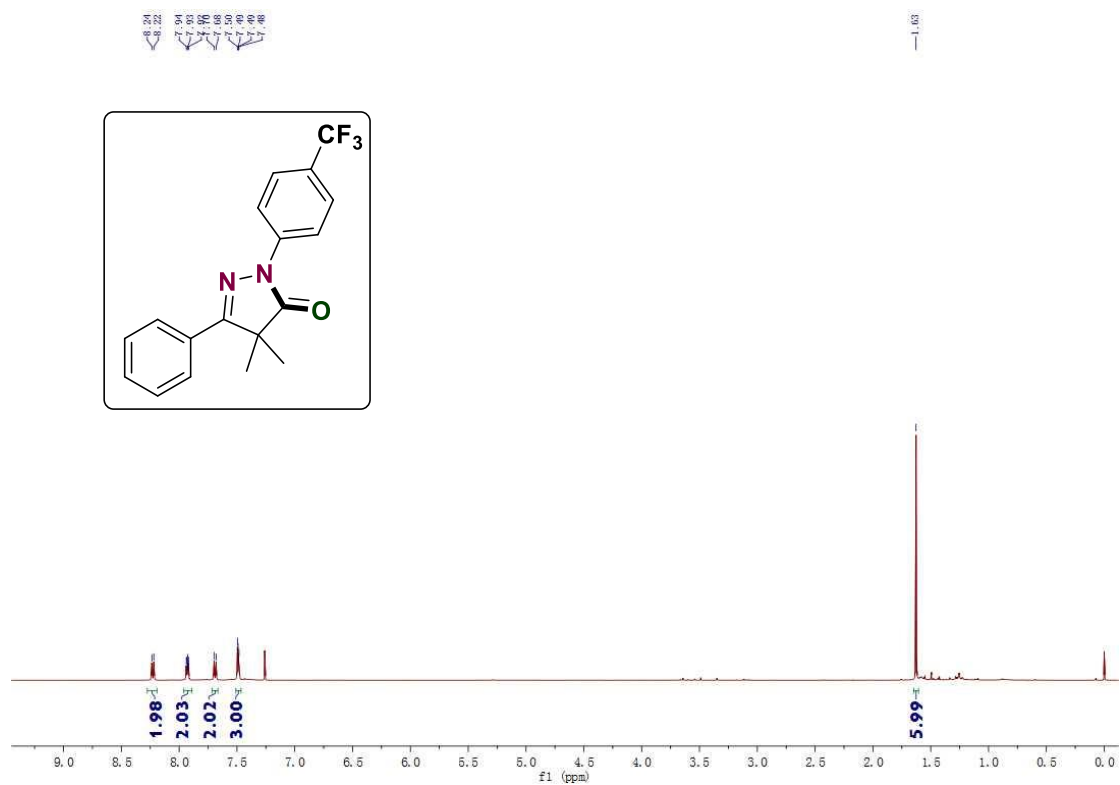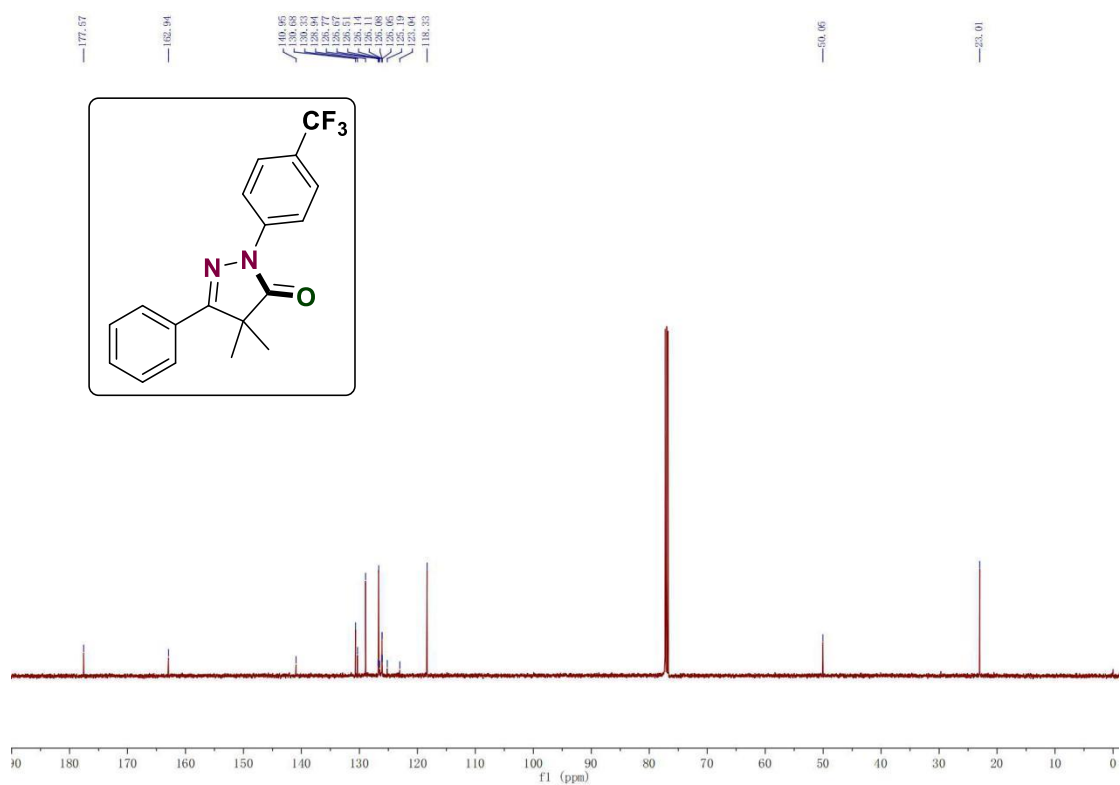

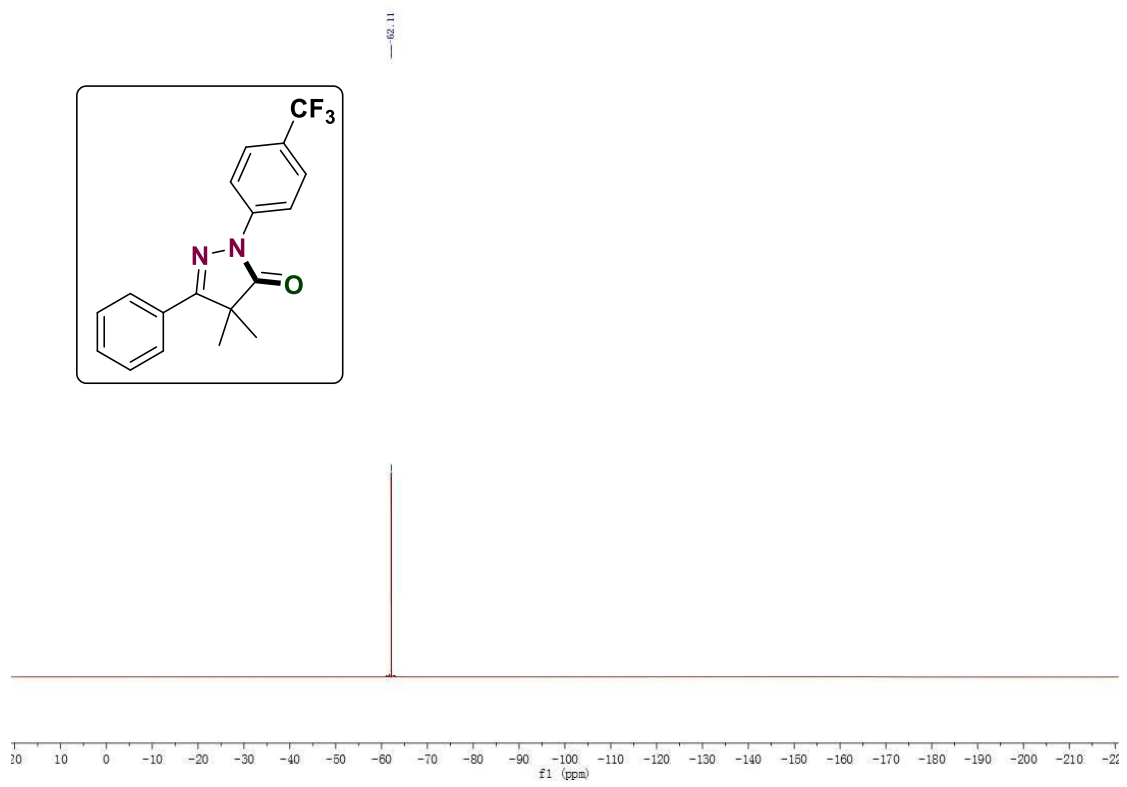

4,4-dimethyl-2-(4-nitrophenyl)-5-phenyl-2,4-dihydro-3H-pyrazol-3-one (2f)

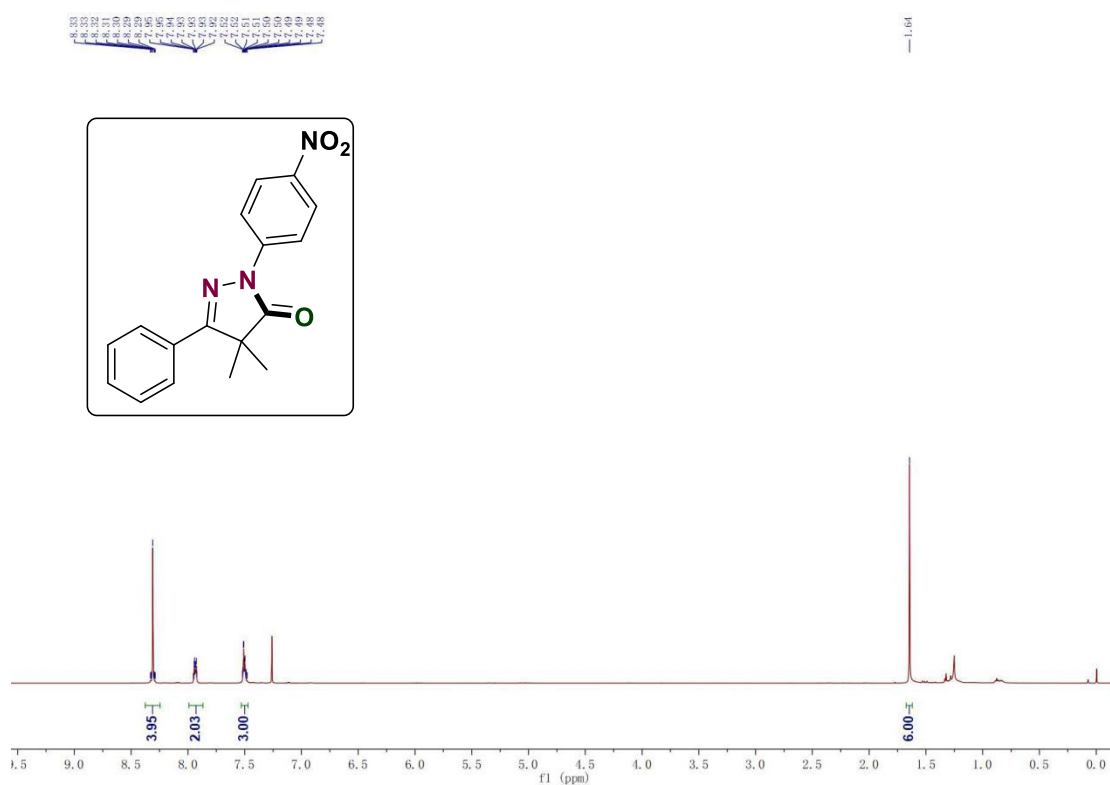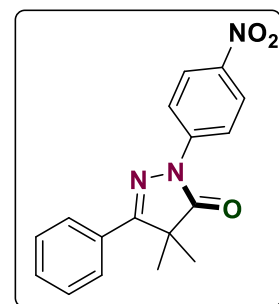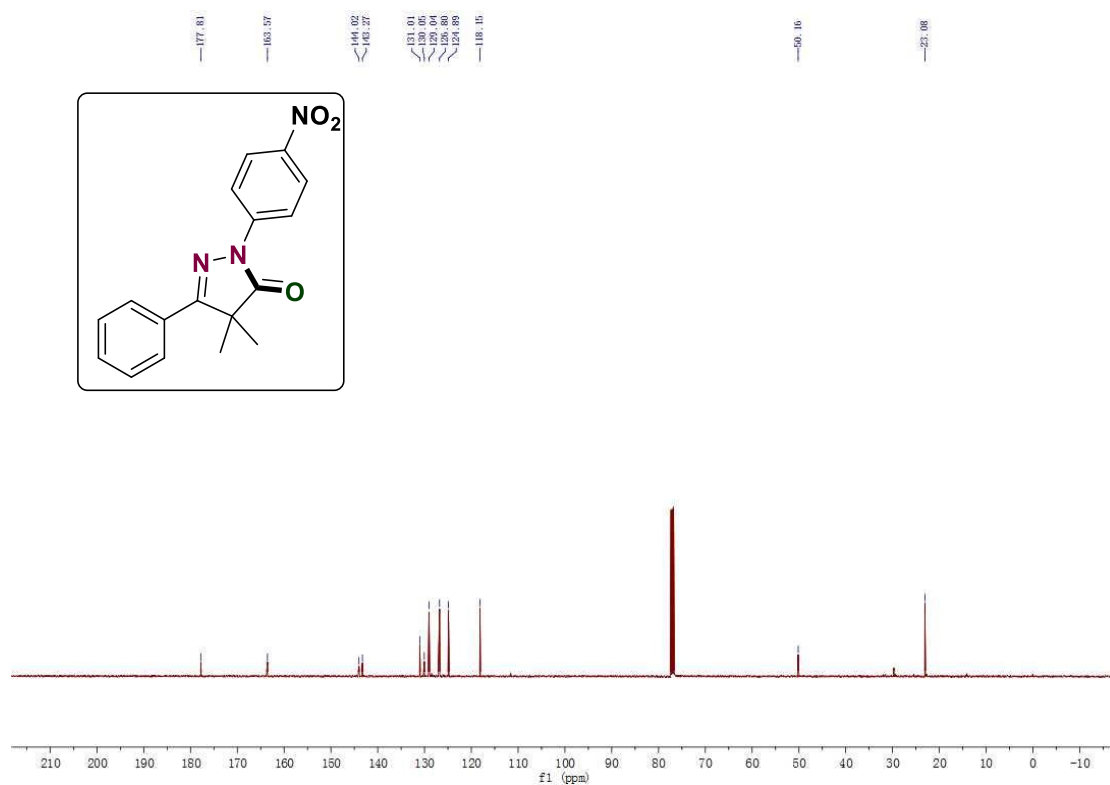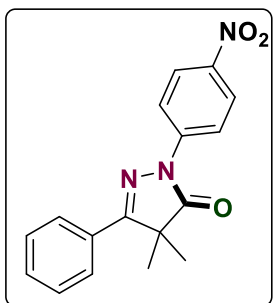

# 4,4-dimethyl-5-phenyl-2-(p-tolyl)-2,4-dihydro-3H-pyrazol-3-one (2g)

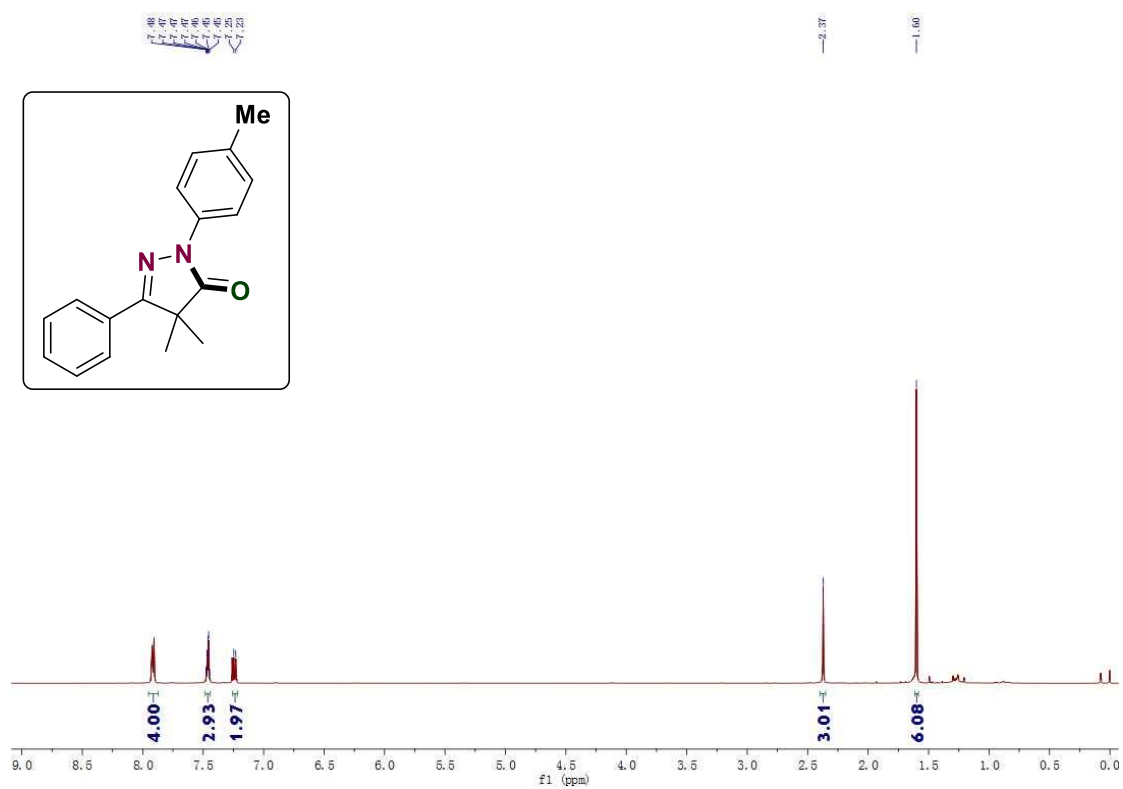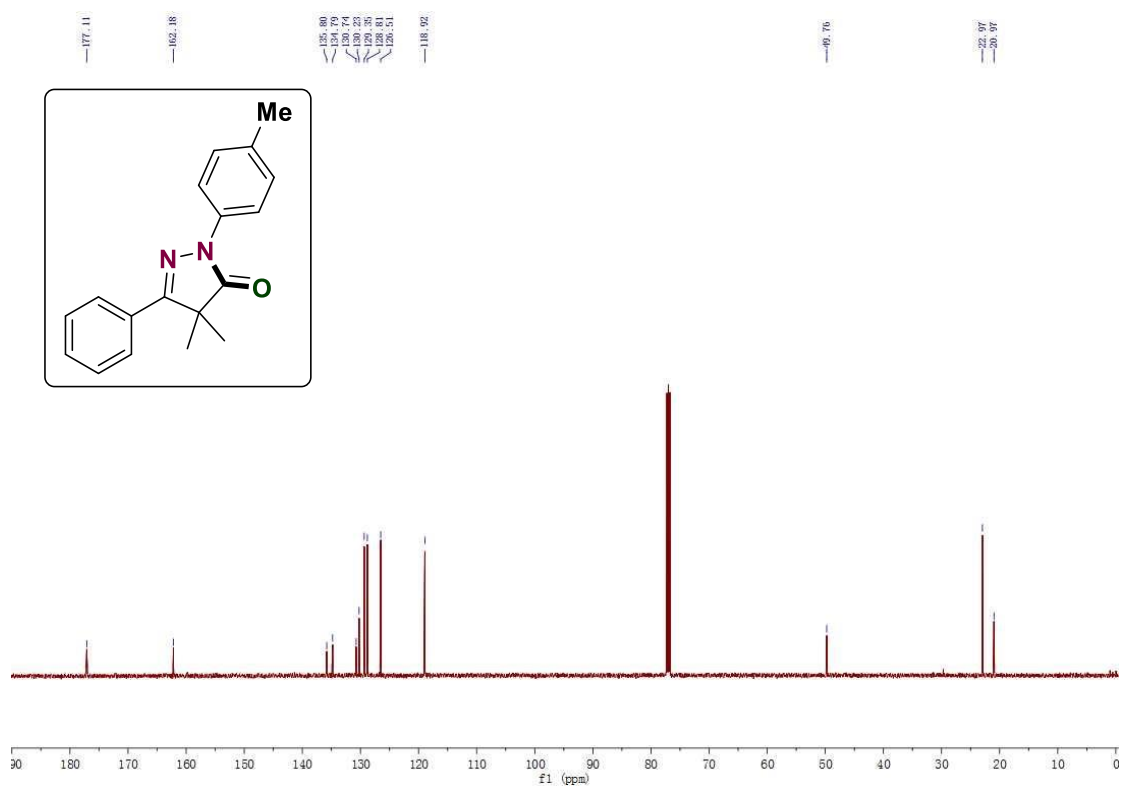



# 4,4-dimethyl-2-(naphthalen-2-yl)-5-phenyl-2,4-dihydro-3H-pyrazol-3-one (2h)

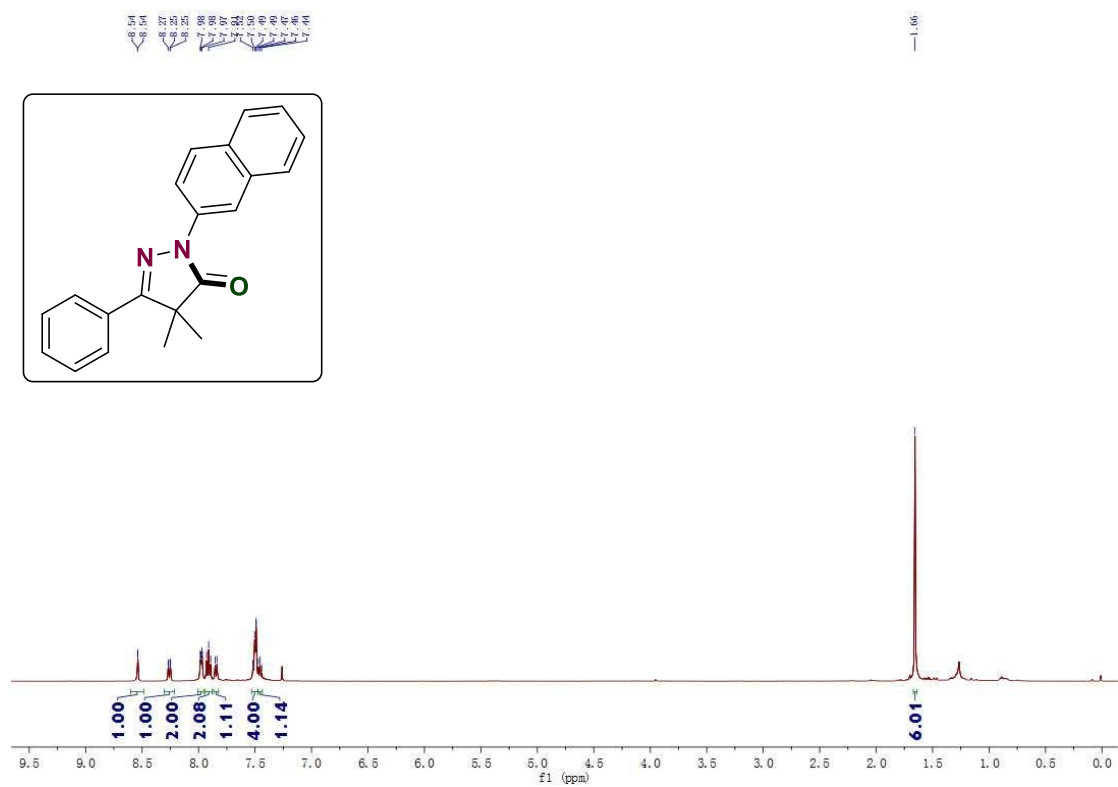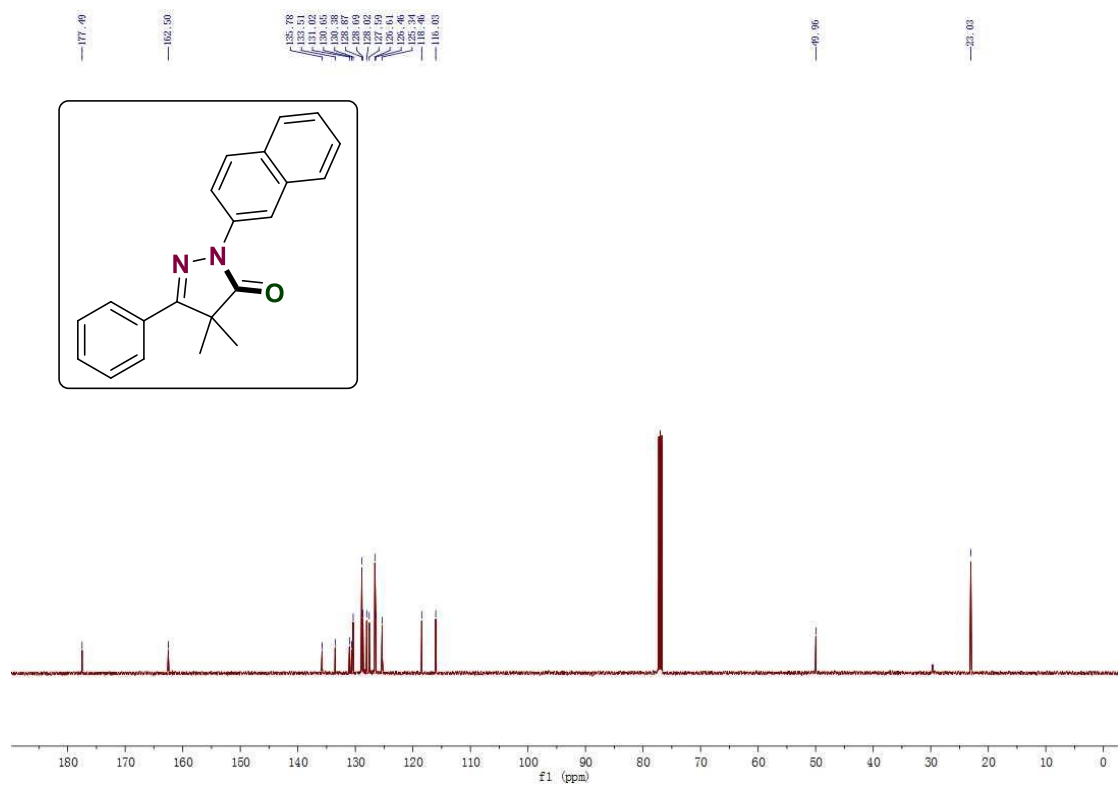

## 2-(3-bromophenyl)-4,4-dimethyl-5-phenyl-2,4-dihydro-3H-pyrazol-3-one (2i)

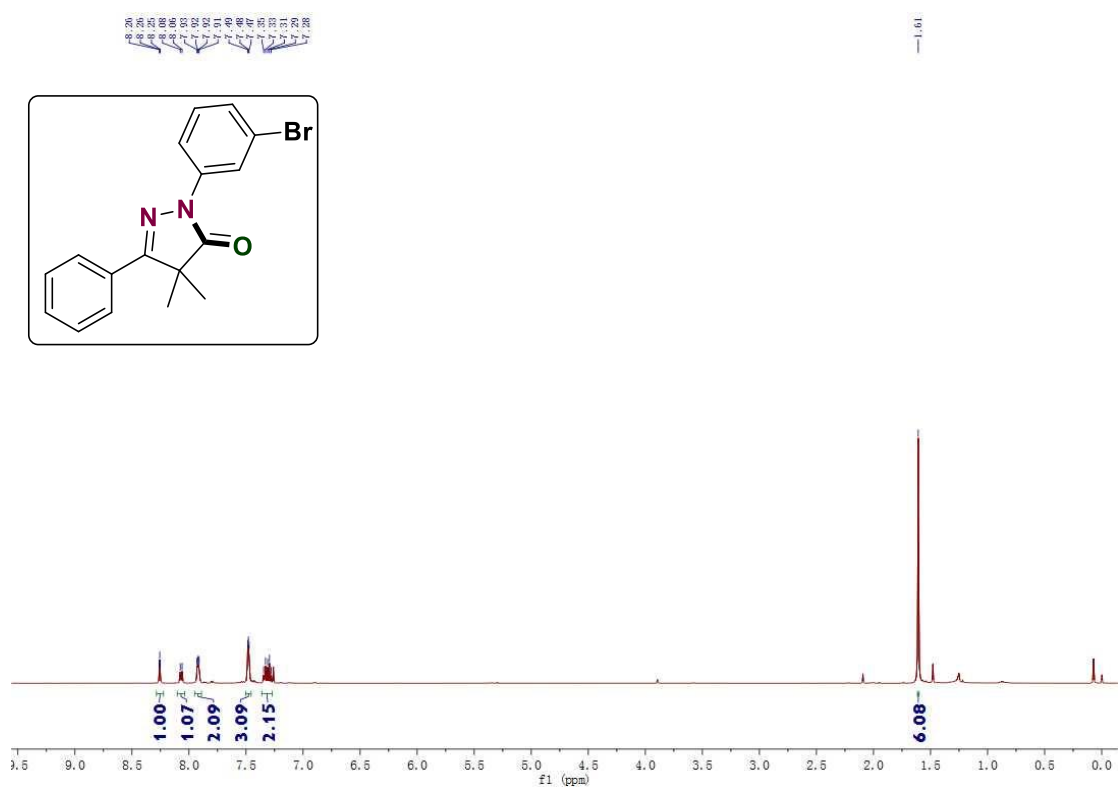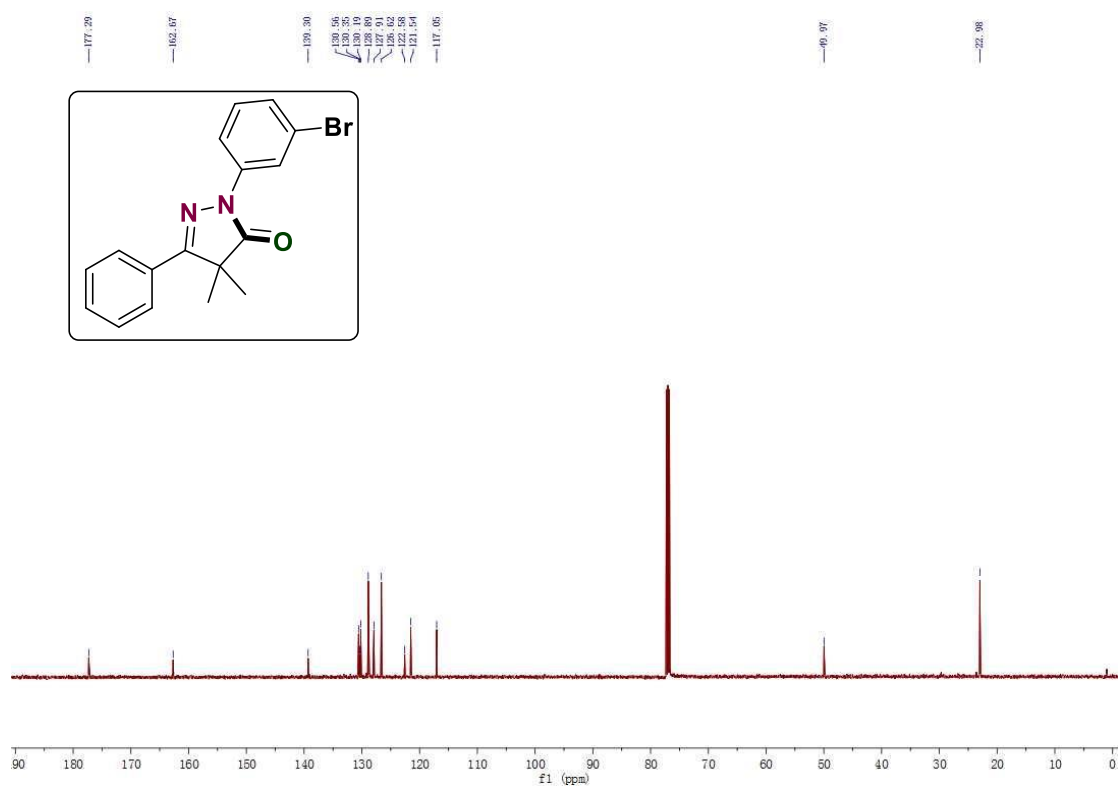



## 2-(2,4-difluorophenyl)-4,4-dimethyl-5-phenyl-2,4-dihydro-3H-pyrazol-3-one (2k)

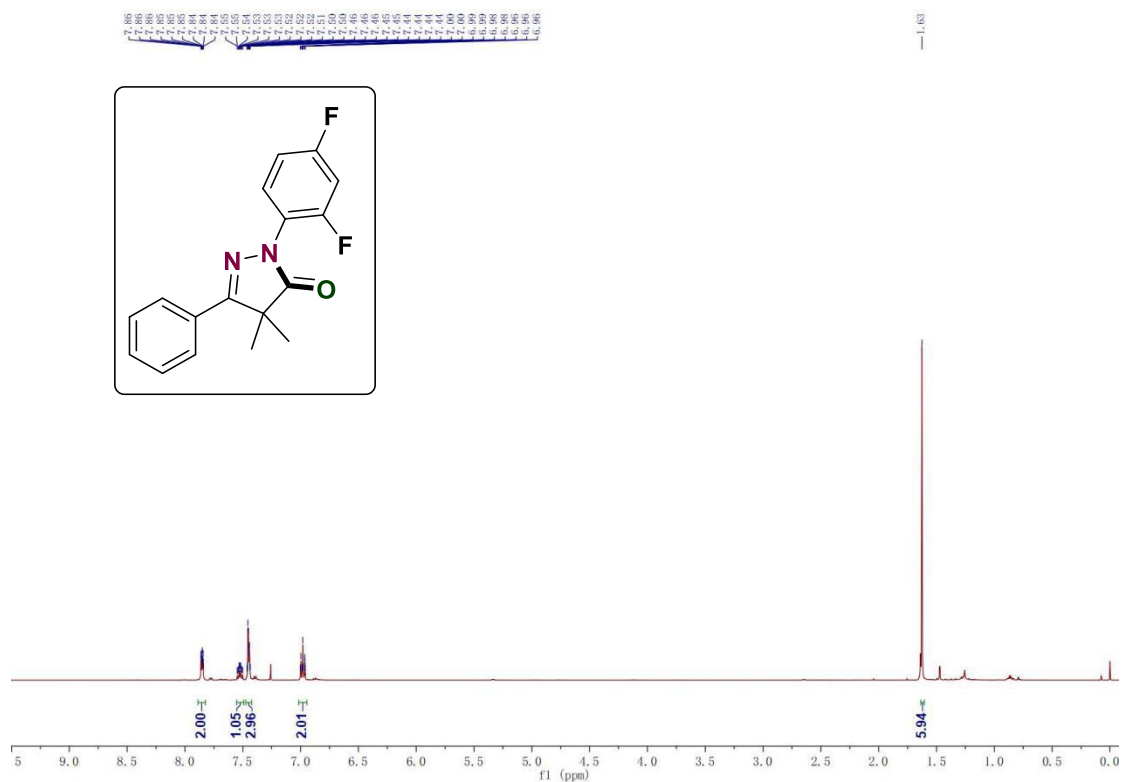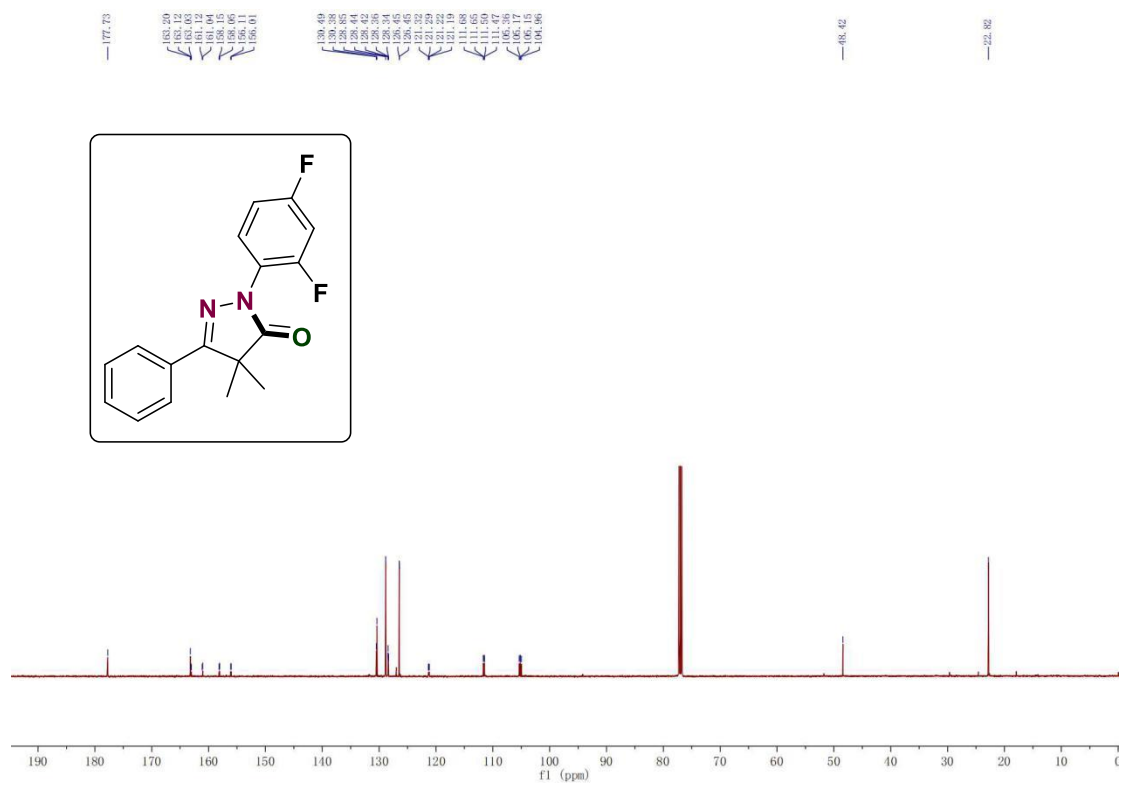

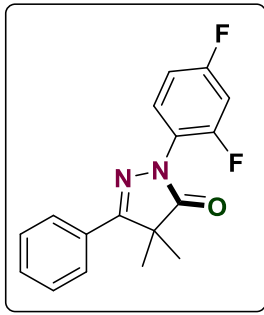

118.07  
118.09  
118.09  
118.11

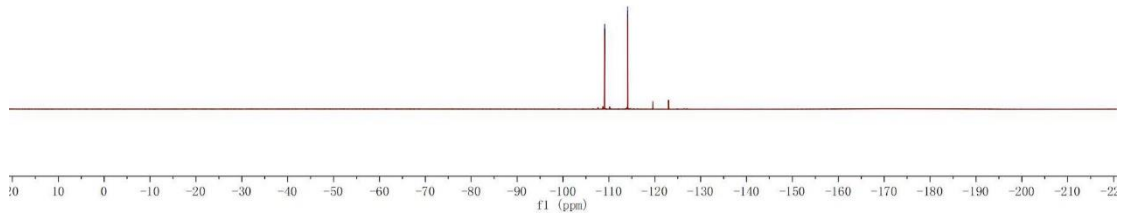

# 2-(3,5-dimethylphenyl)-4,4-dimethyl-5-phenyl-2,4-dihydro-3H-pyrazol-3-one (2l)

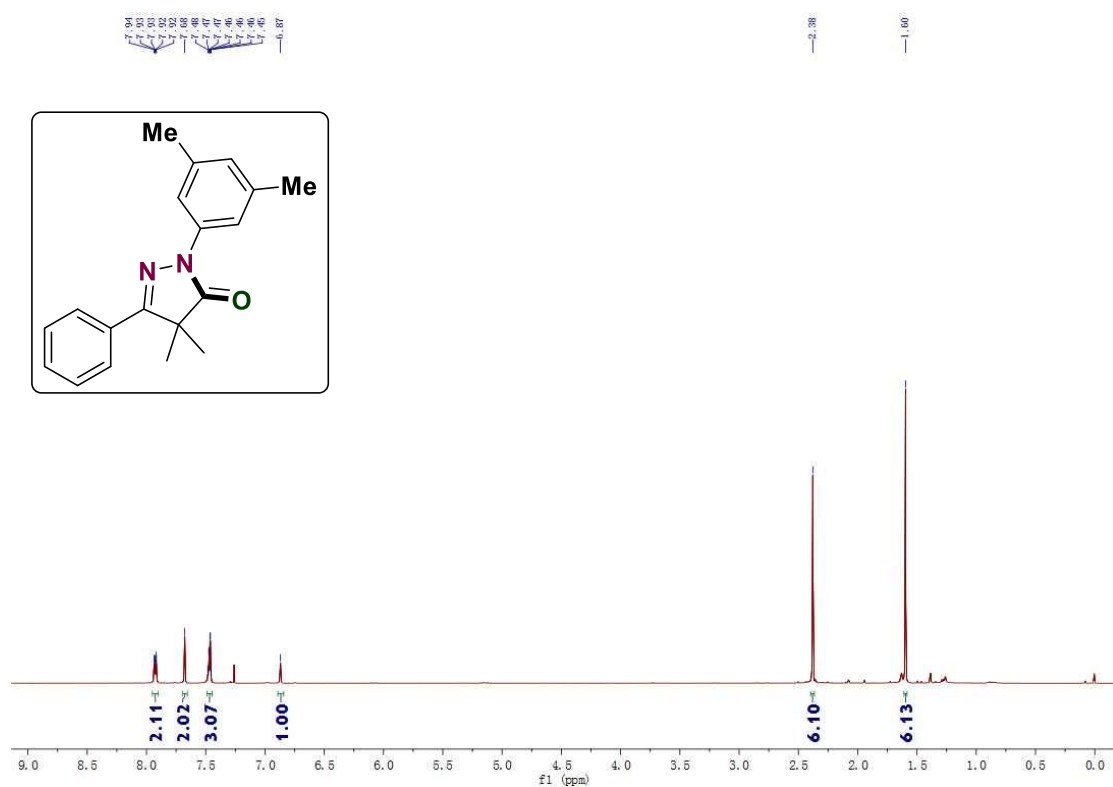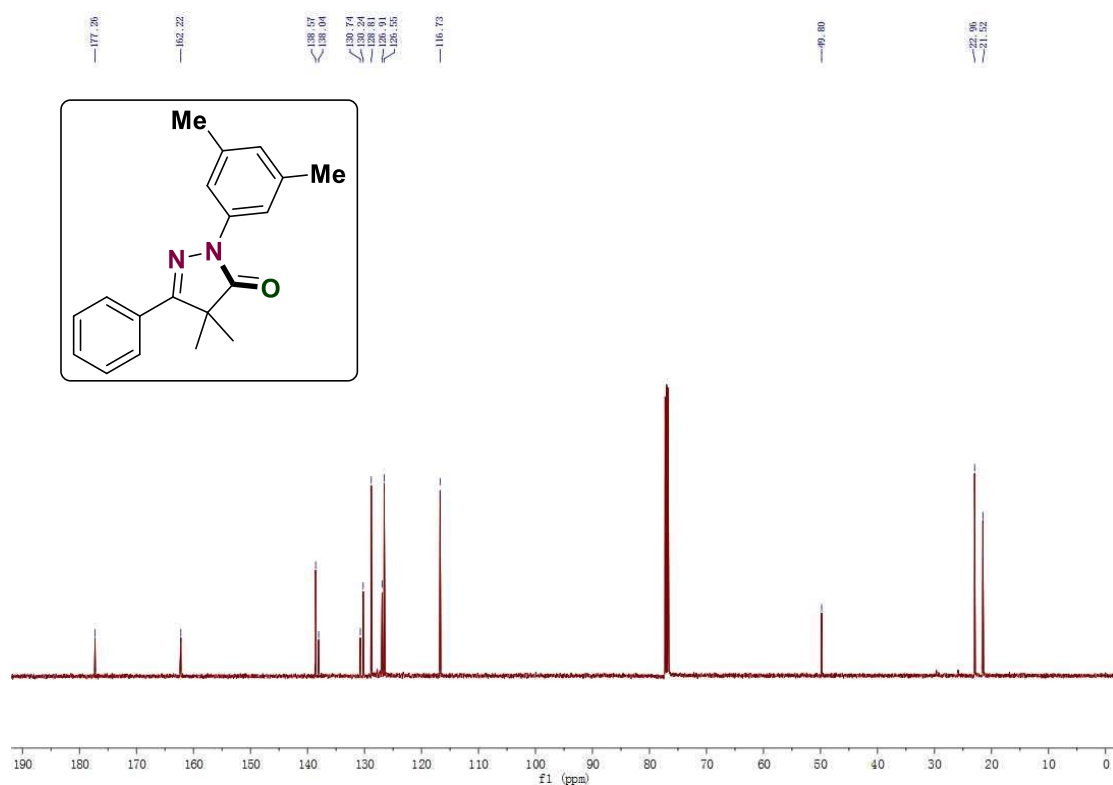

# 5-(4-isopropylphenyl)-4,4-dimethyl-2-phenyl-2,4-dihydro-3H-pyrazol-3-one (2m)

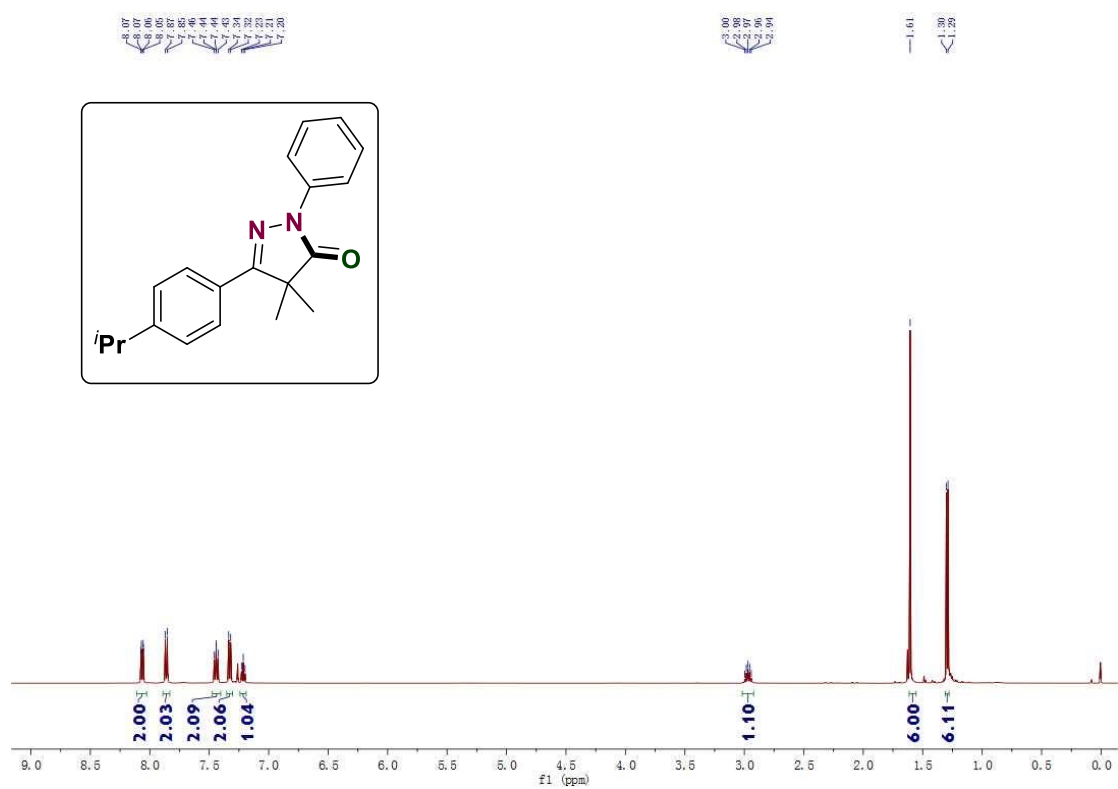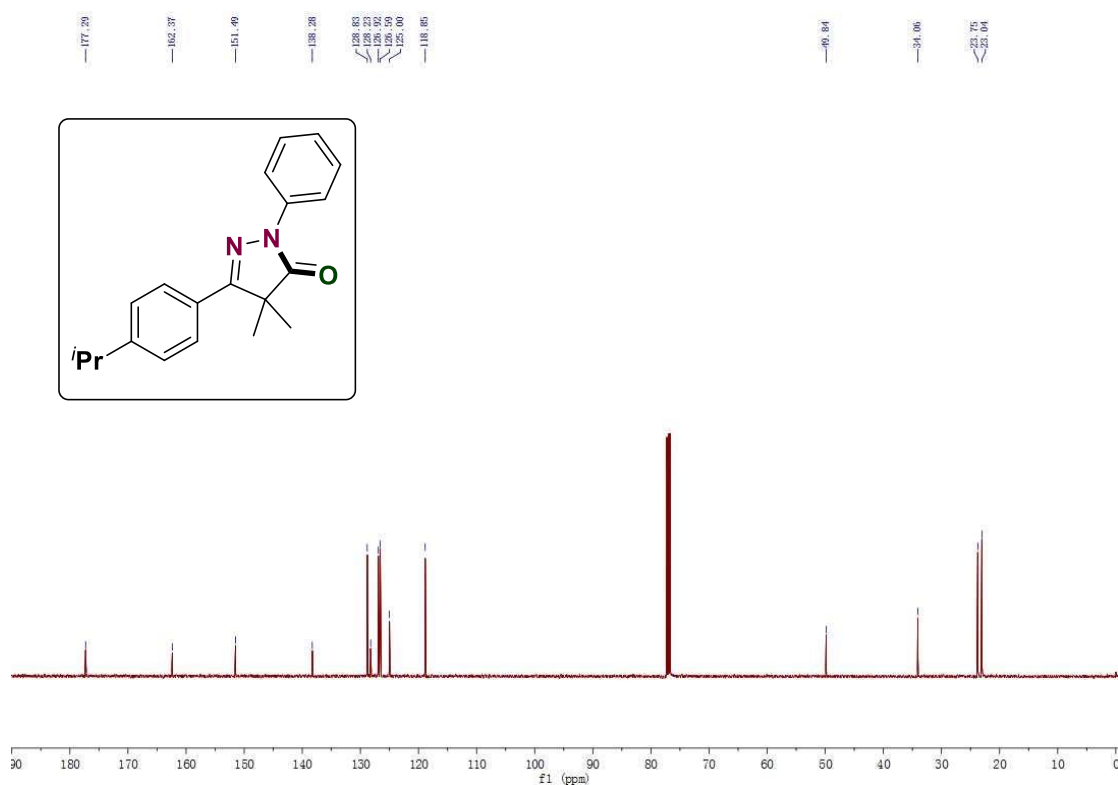

# 5-(4-methoxyphenyl)-4,4-dimethyl-2-phenyl-2,4-dihydro-3H-pyrazol-3-one (2n)

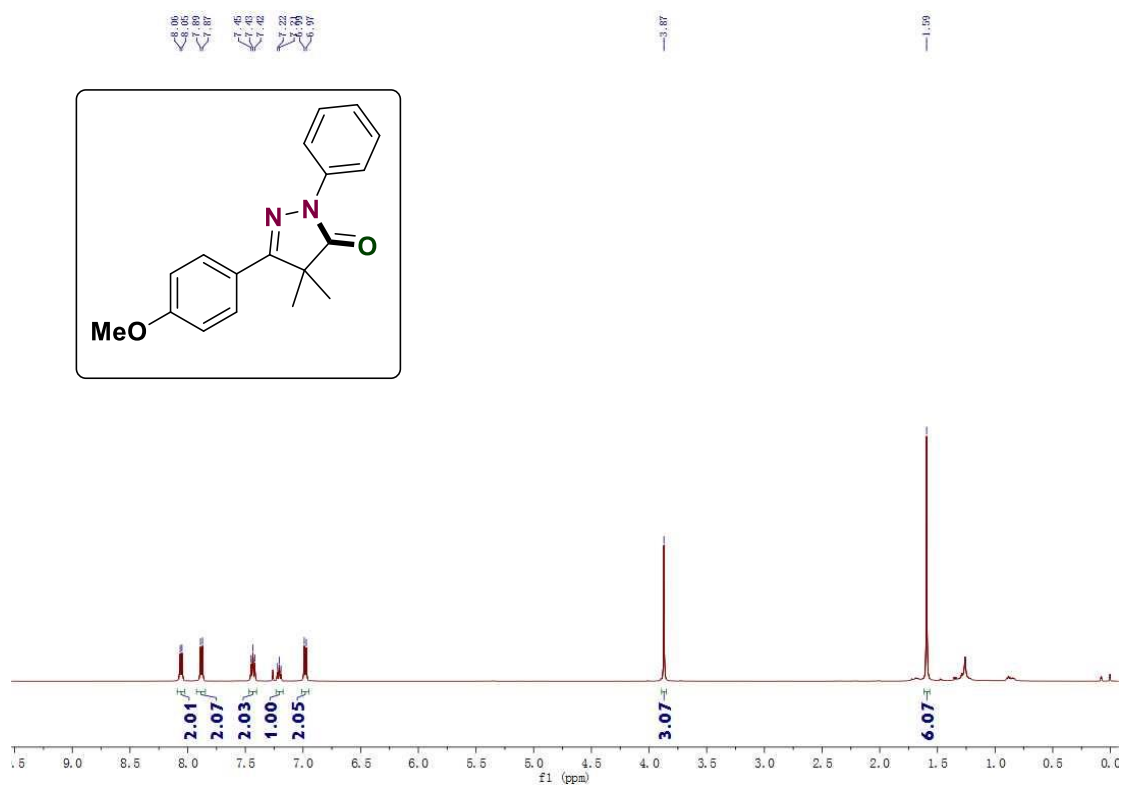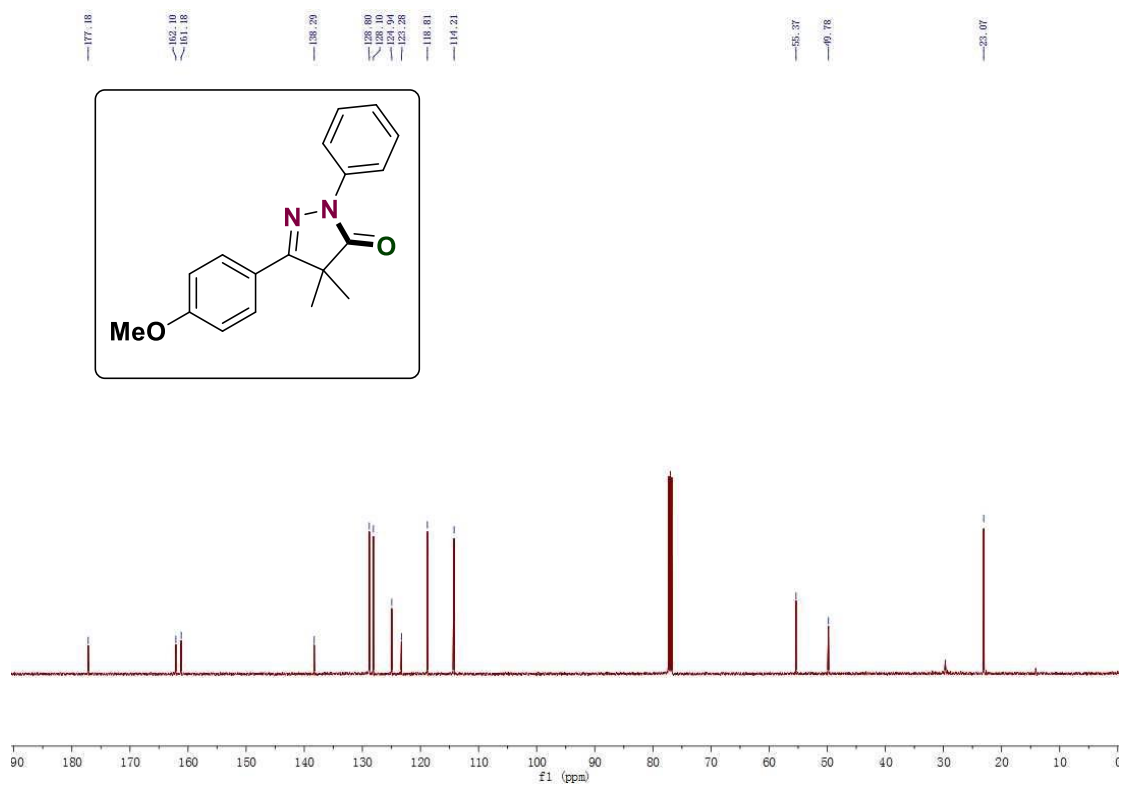



# 5-([1,1'-biphenyl]-4-yl)-4,4-dimethyl-2-phenyl-2,4-dihydro-3H-pyrazol-3-one (2o)

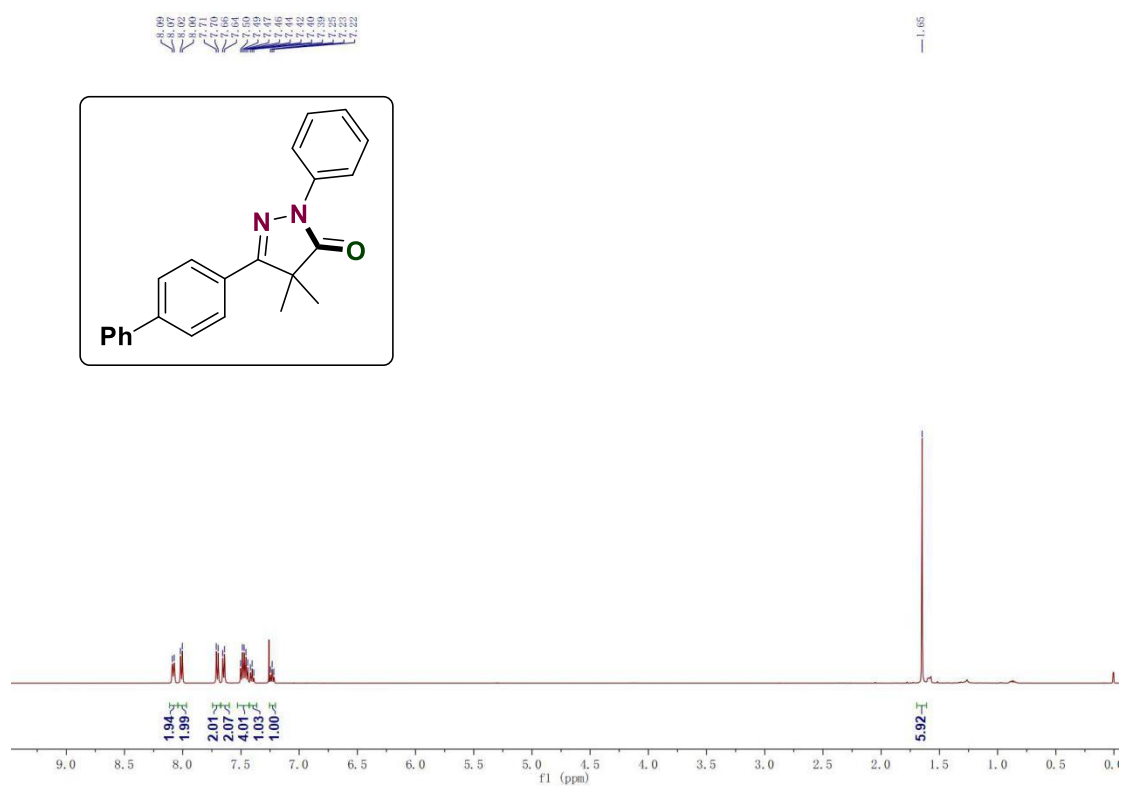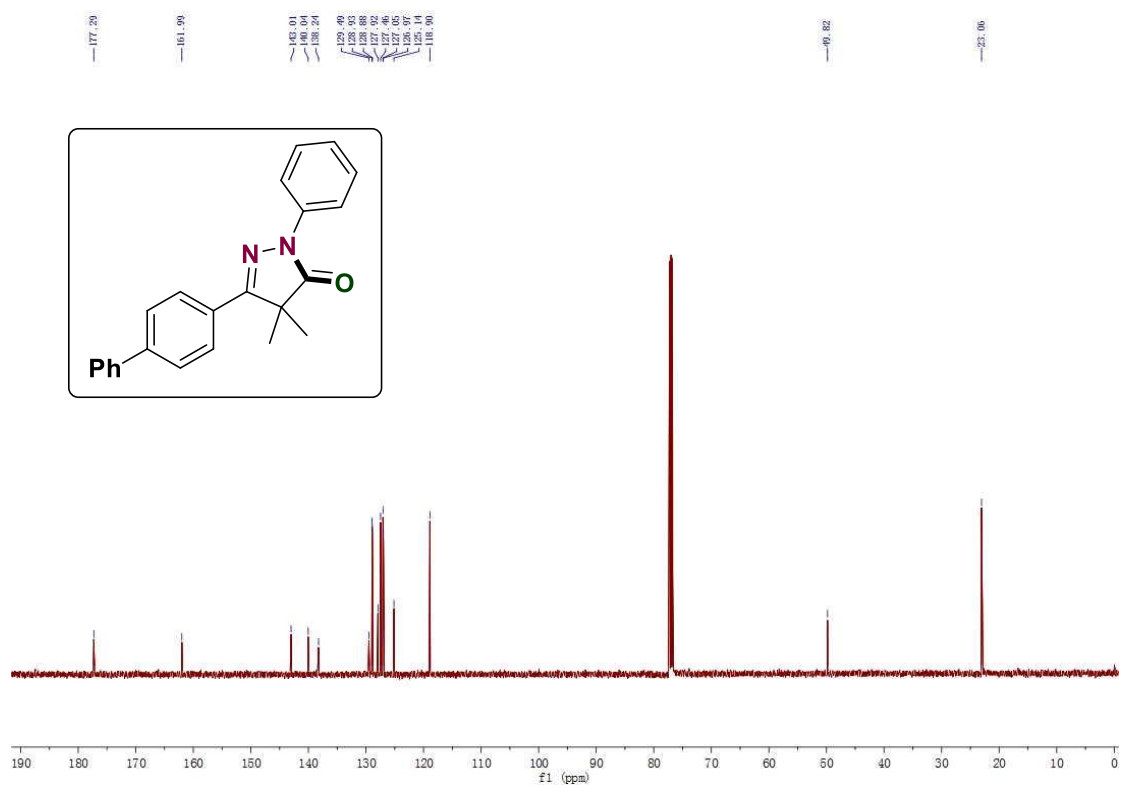

# 4,4-dimethyl-2-phenyl-5-(m-tolyl)-2,4-dihydro-3H-pyrazol-3-one (2p)

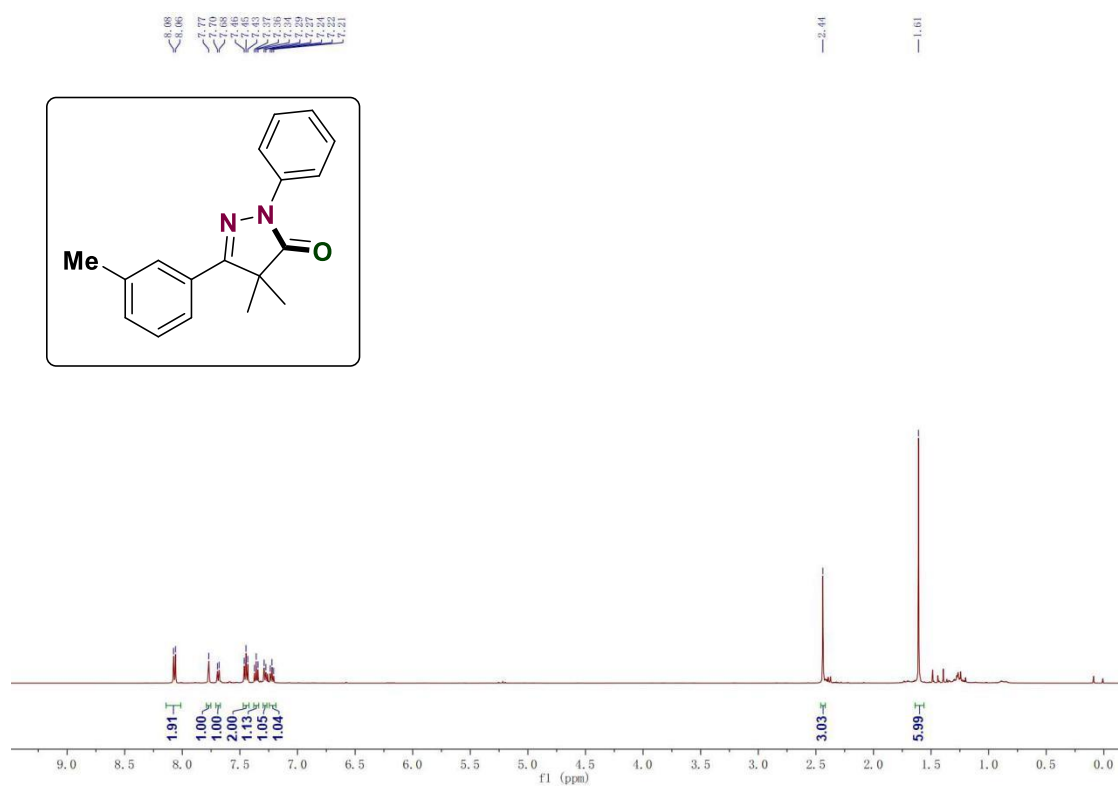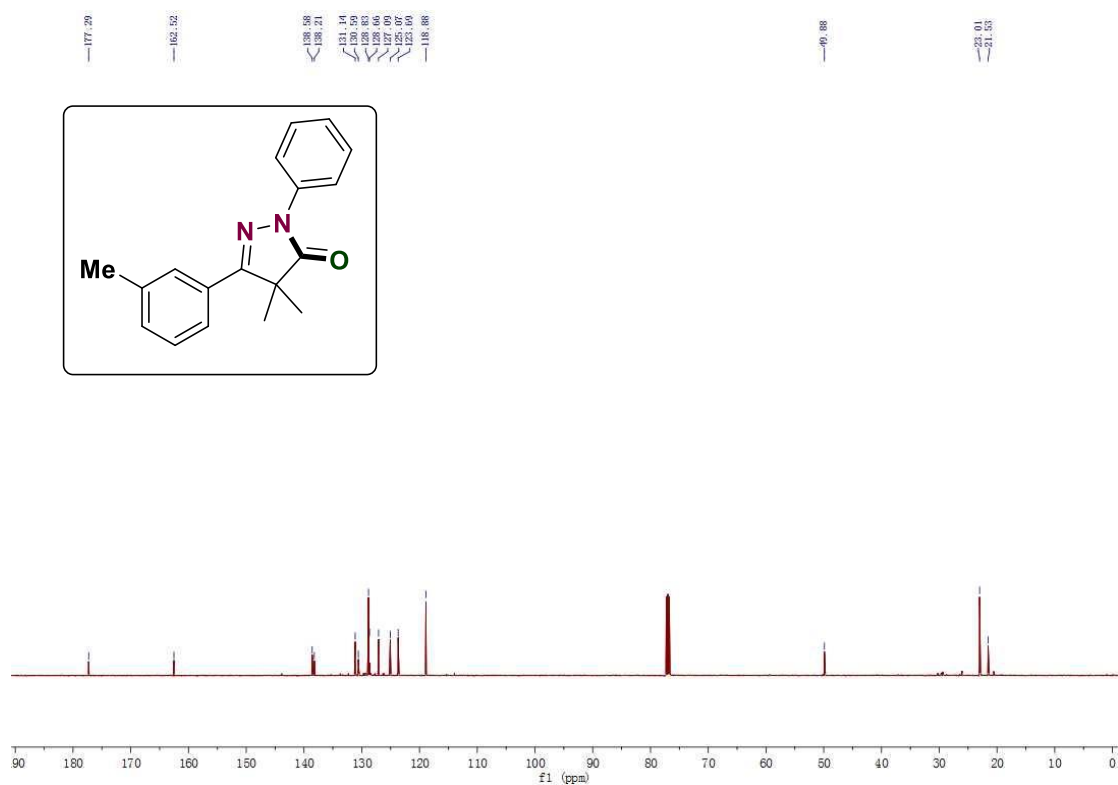

# 5-(3-methoxyphenyl)-4,4-dimethyl-2-phenyl-2,4-dihydro-3H-pyrazol-3-one (2q)

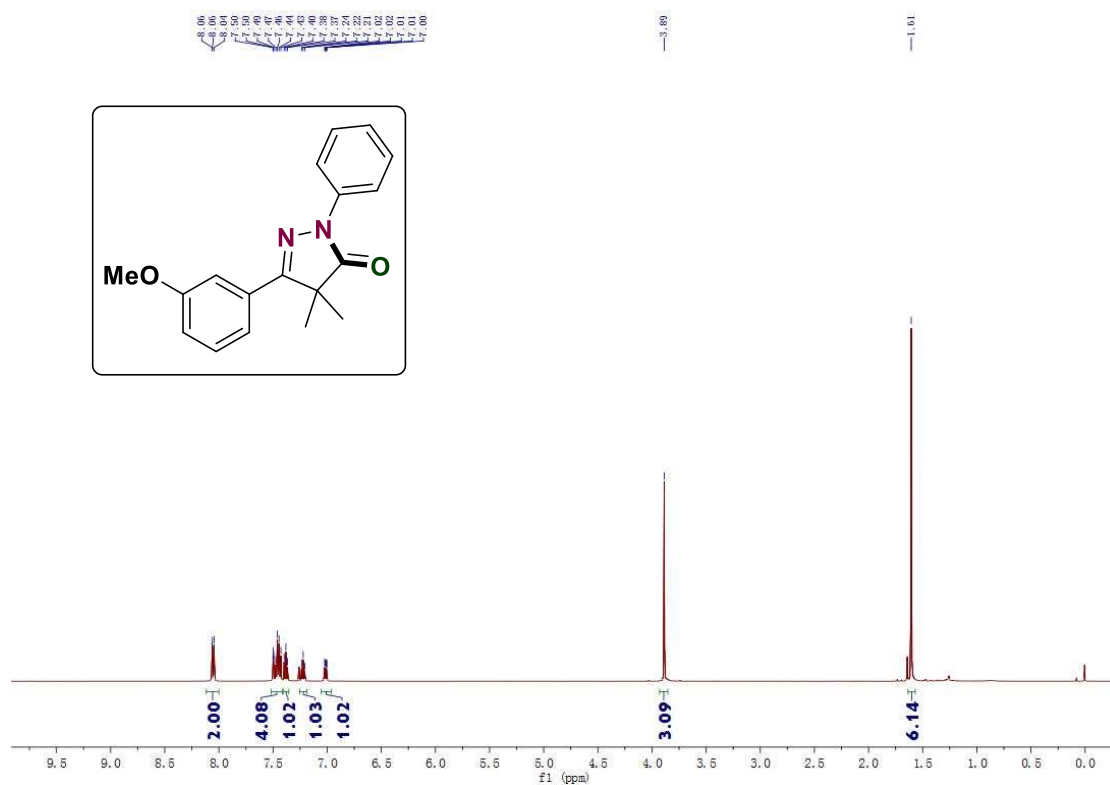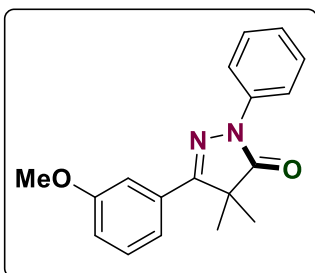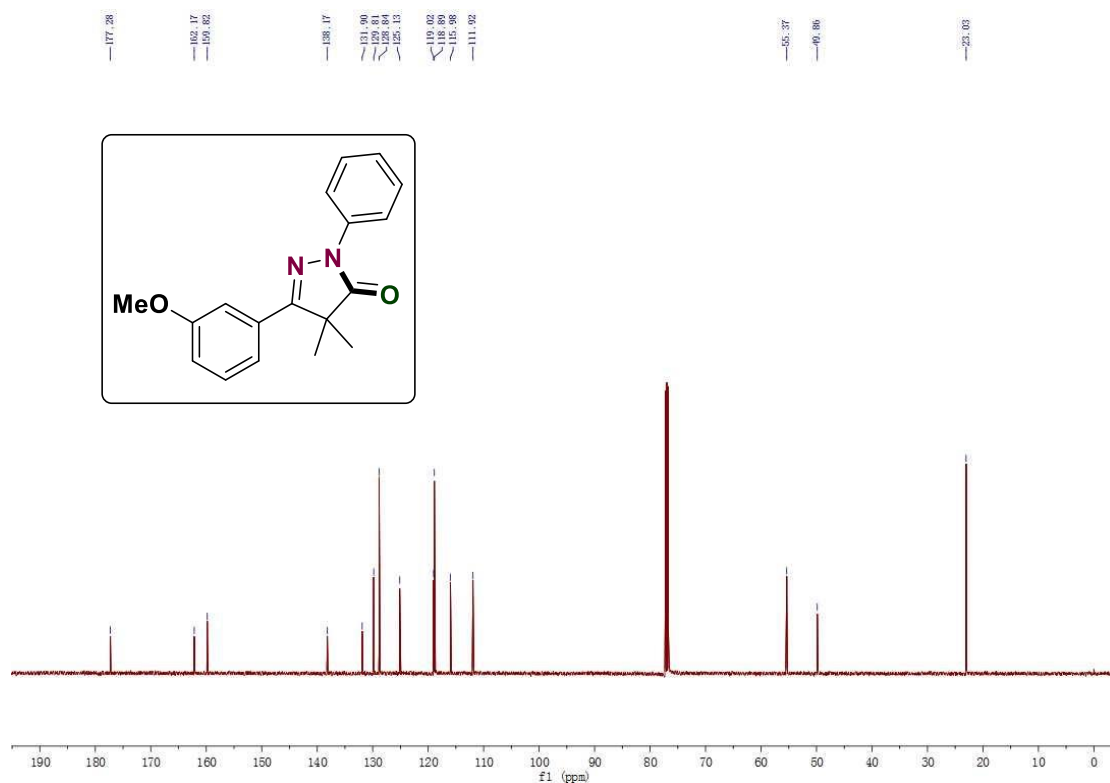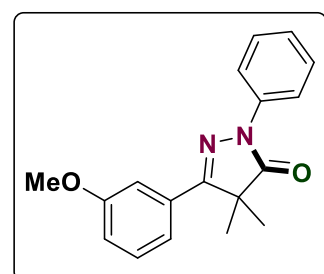

**4,4-dimethyl-2-phenyl-5-(4-(trifluoromethyl)phenyl)-2,4-dihydro-3H-pyrazol-3-one (2r)**

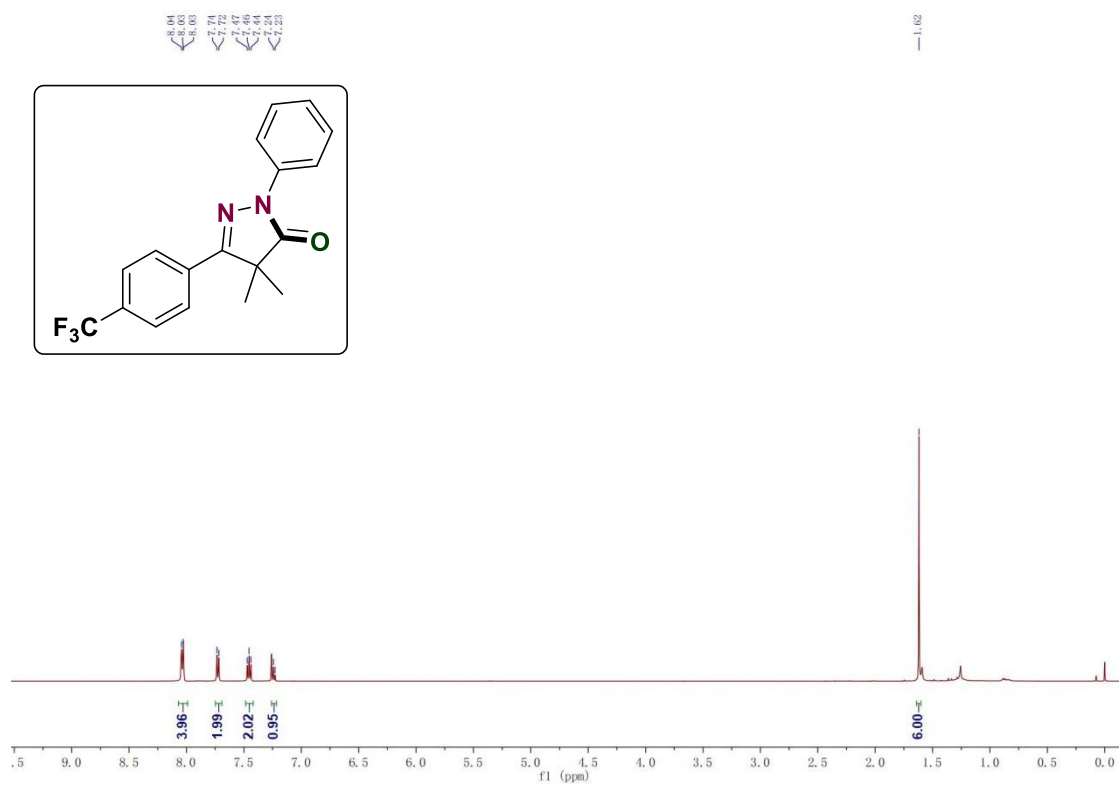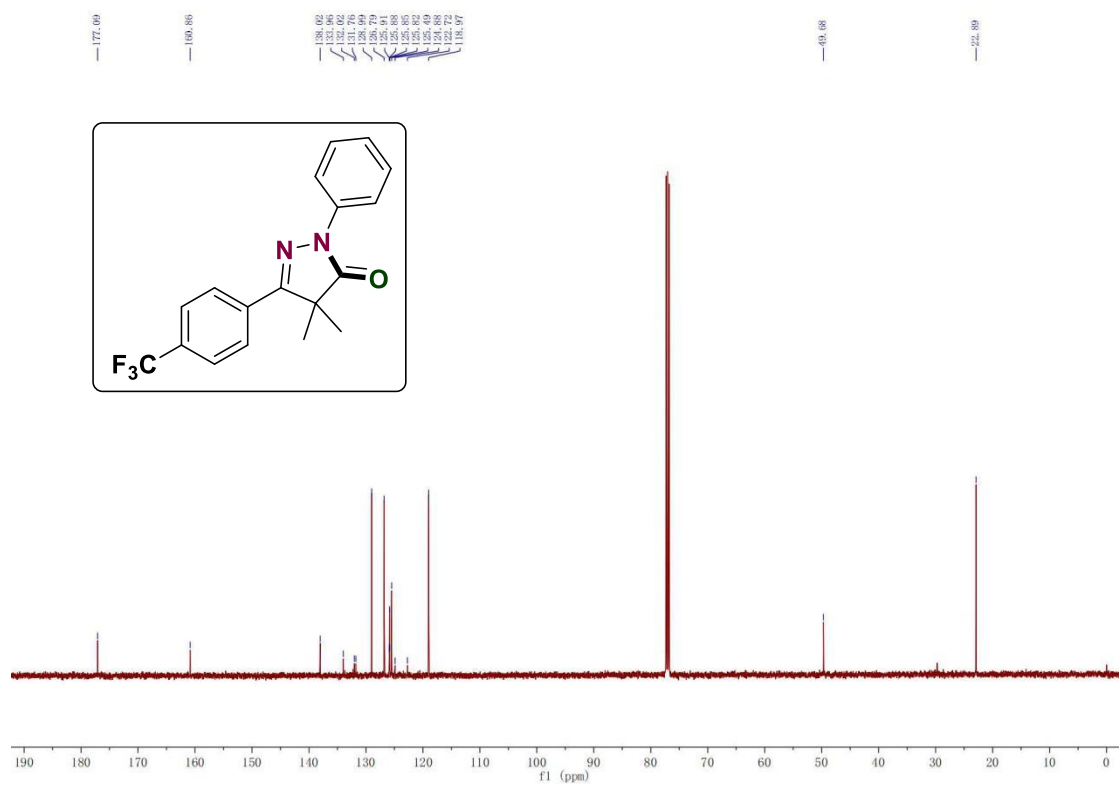

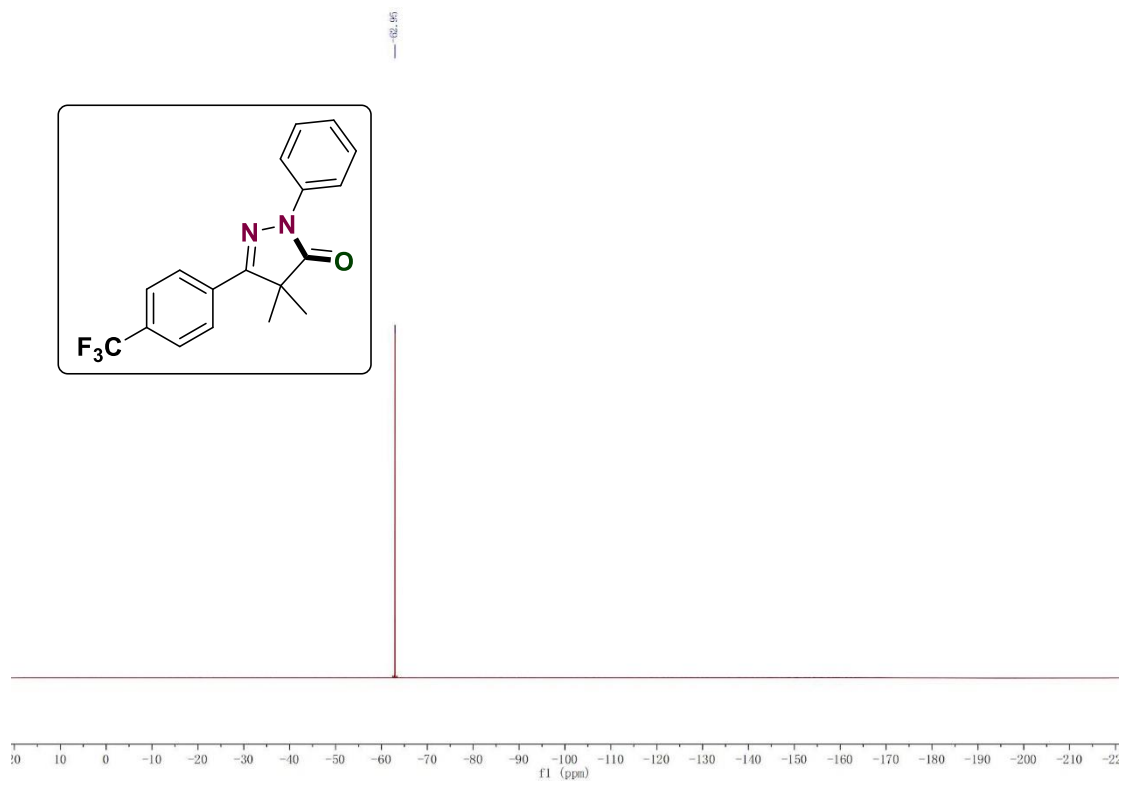

# 5-(3-fluorophenyl)-4,4-dimethyl-2-phenyl-2,4-dihydro-3H-pyrazol-3-one (2s)

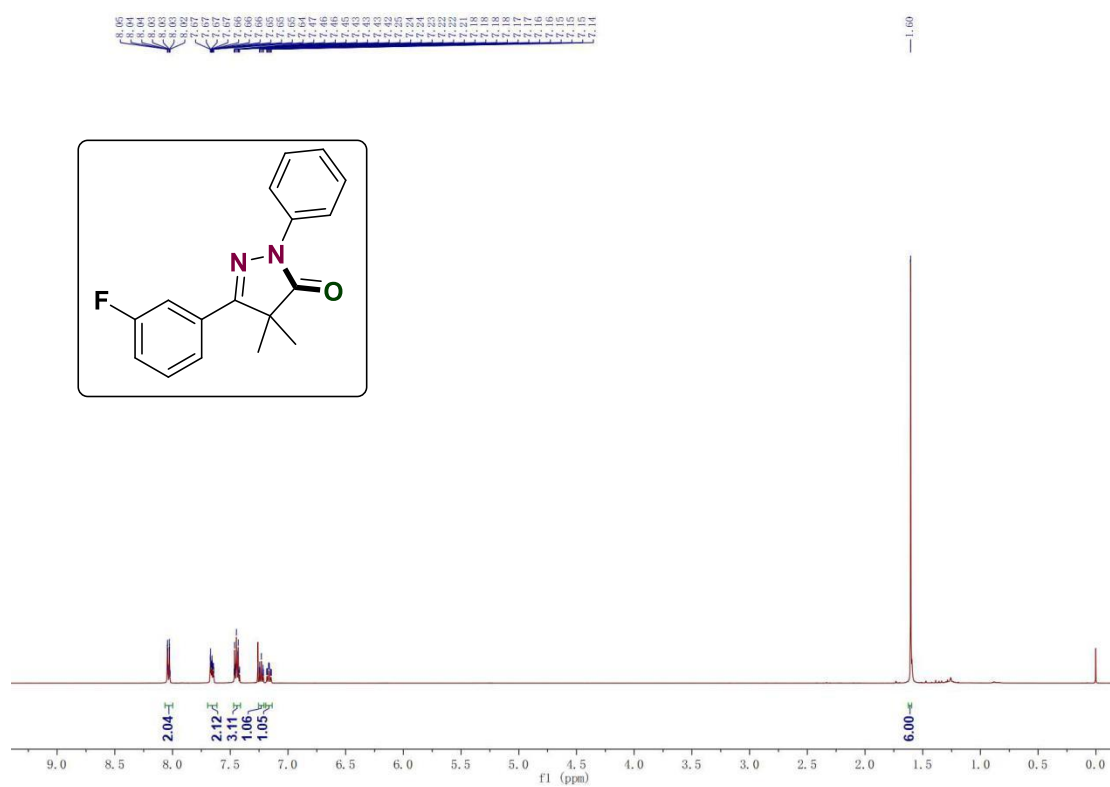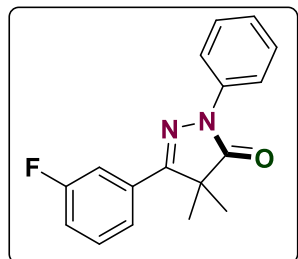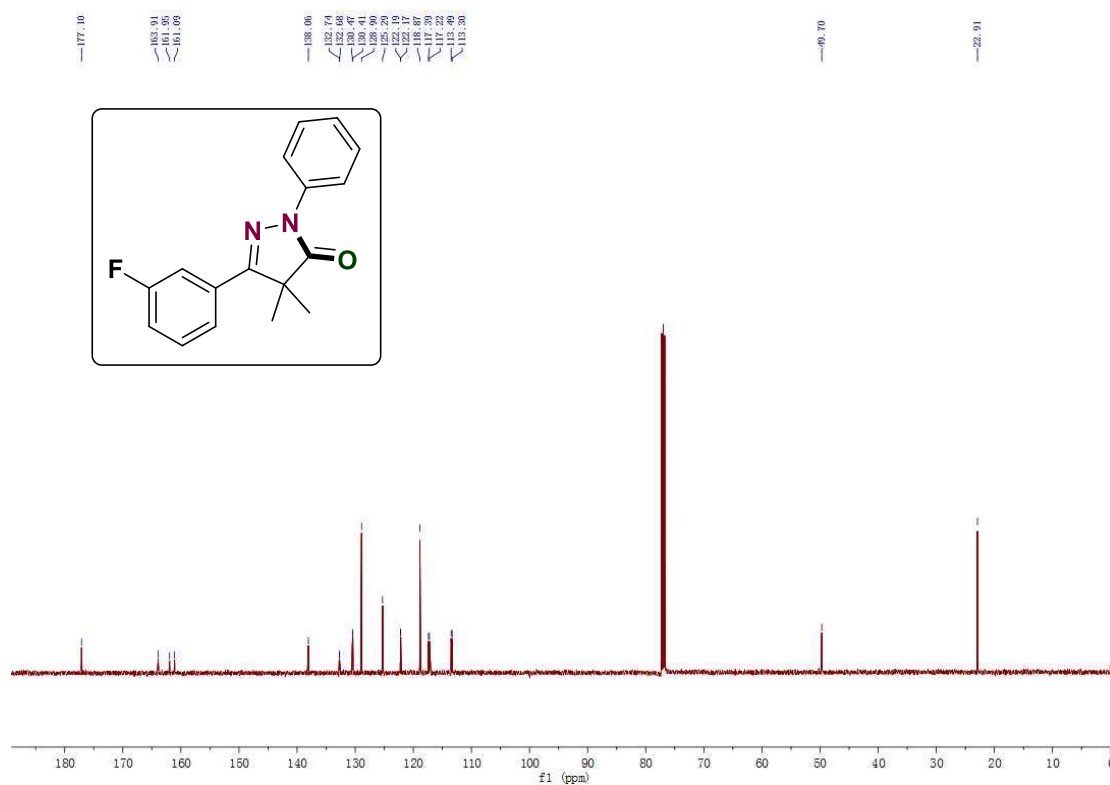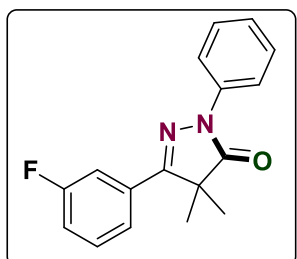

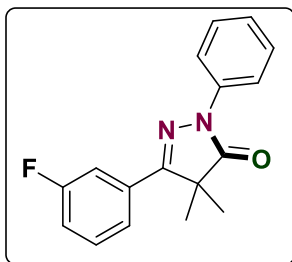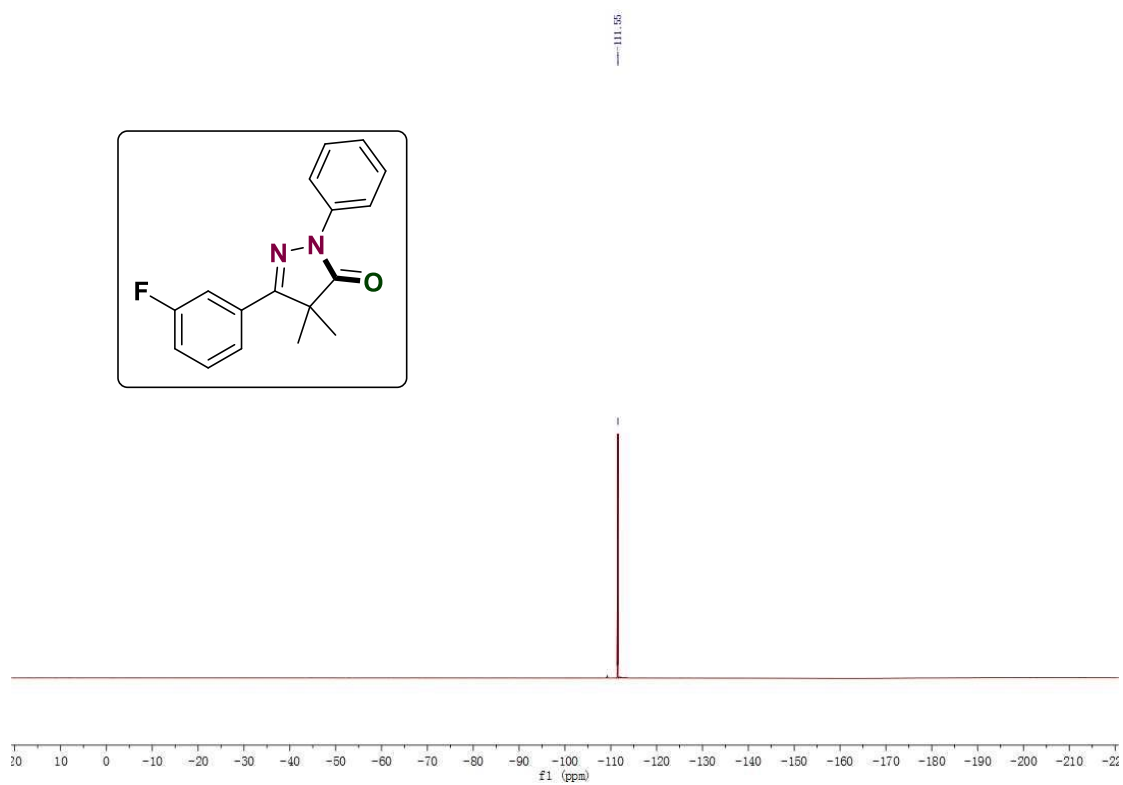





# 4,4-dimethyl-2-phenyl-5-(thiophen-2-yl)-2,4-dihydro-3H-pyrazol-3-one (2u)

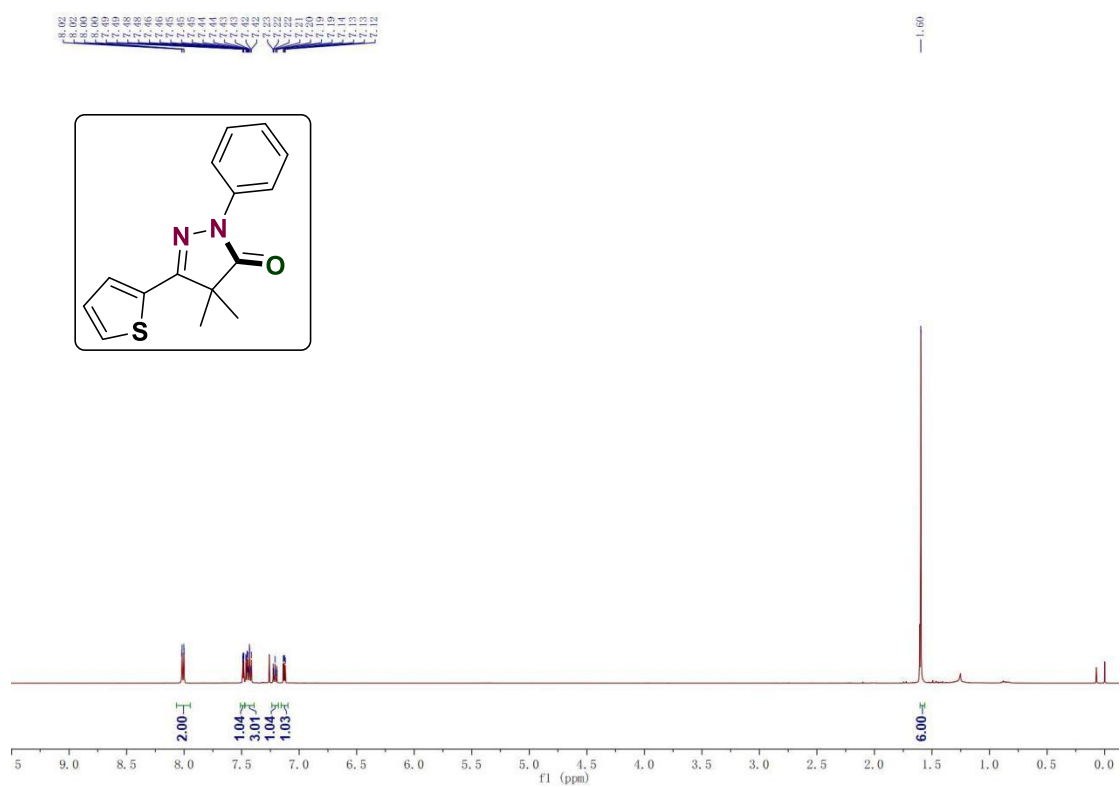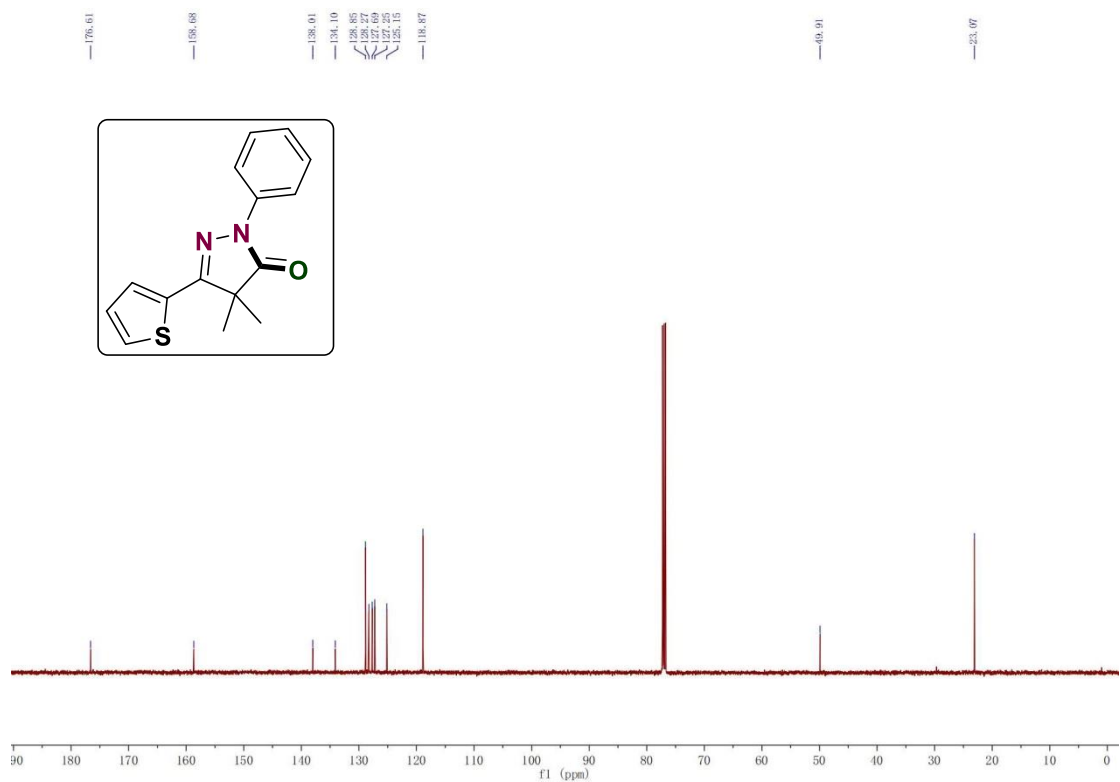

# 4,4,5-trimethyl-1,3-diphenyl-4,5-dihydro-1H-pyrazole (3a)

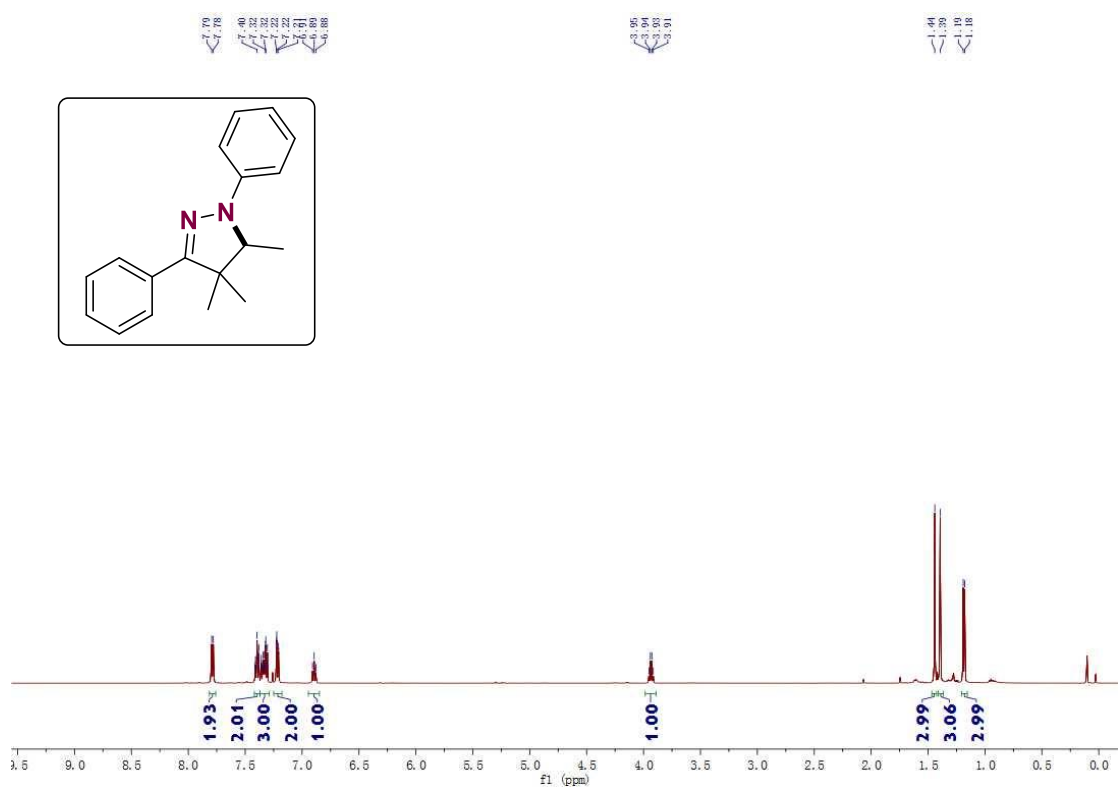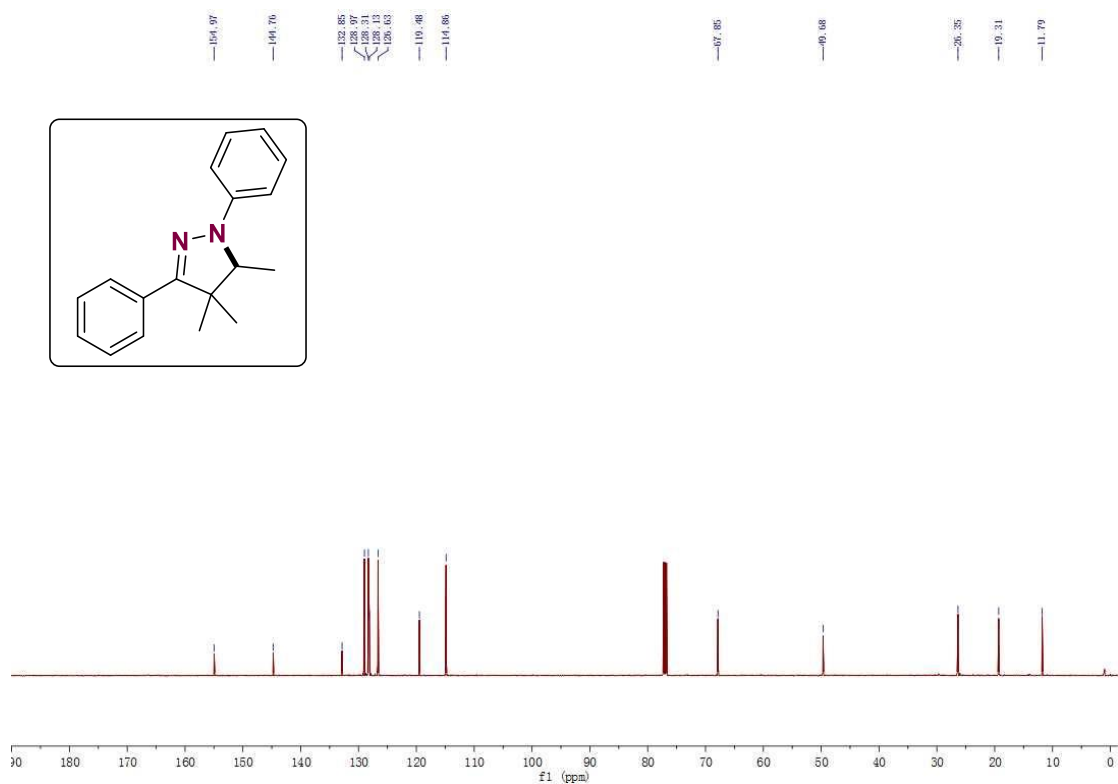



### 3-(4-methoxyphenyl)-4,4,5-trimethyl-1-phenyl-4,5-dihydro-1H-pyrazole (3c)

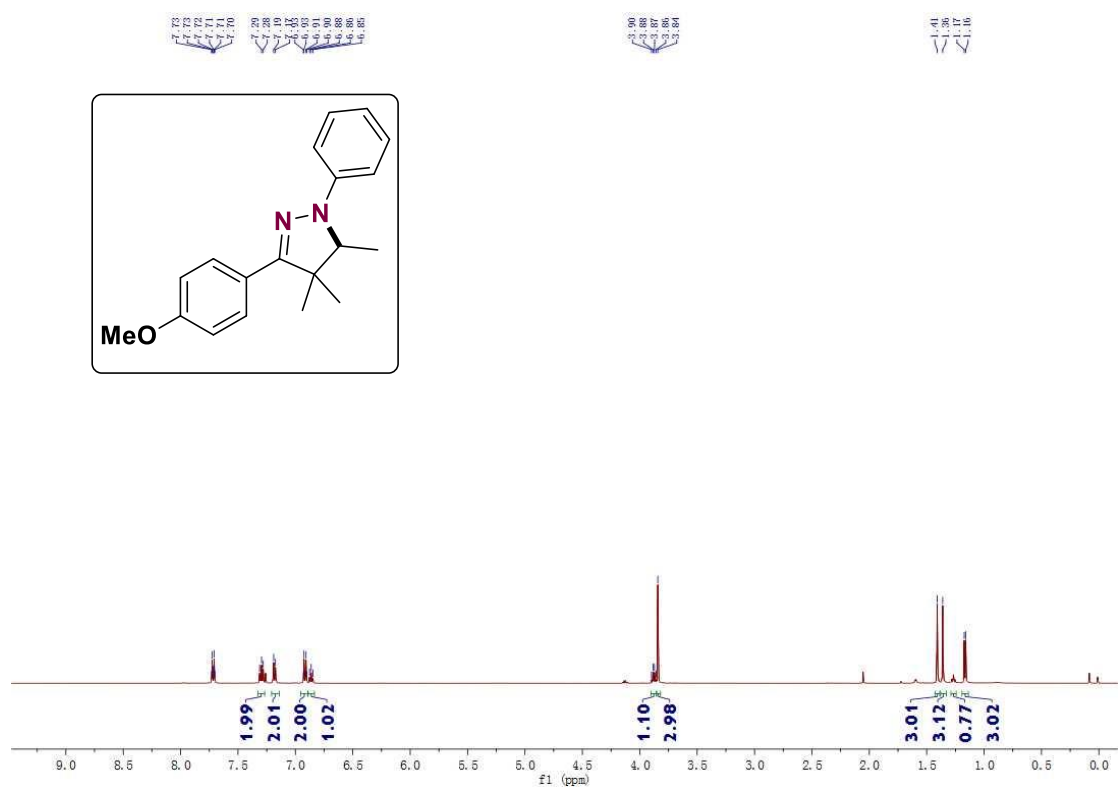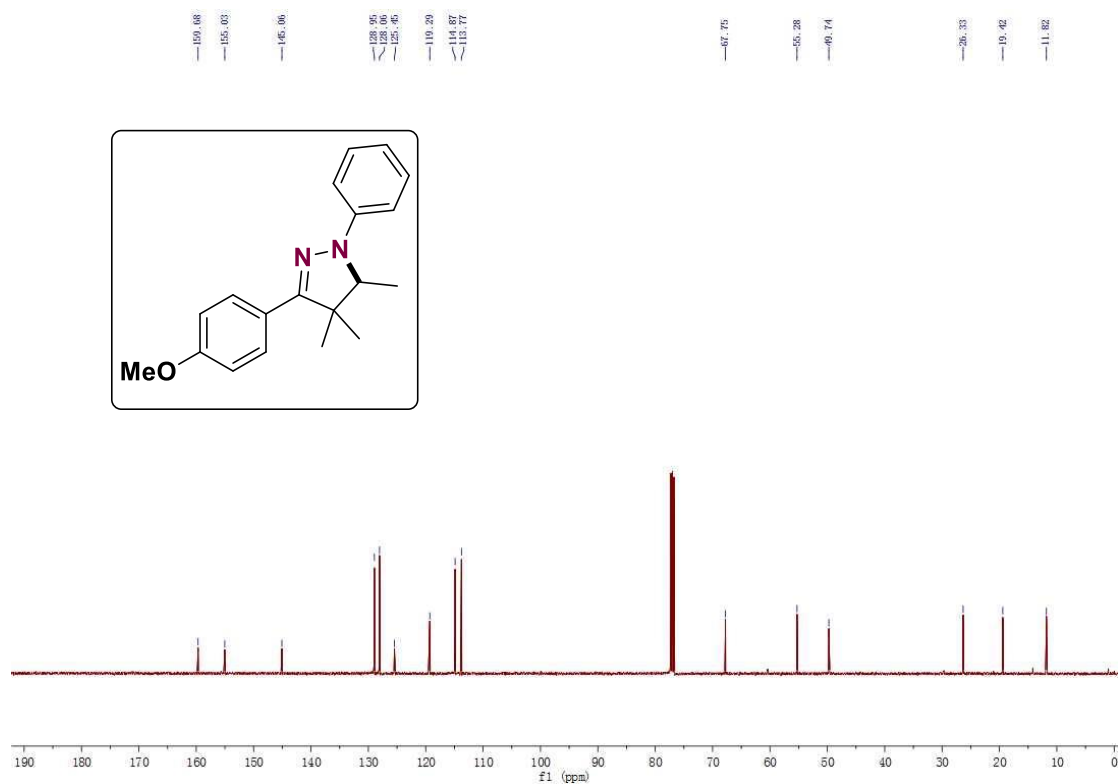



### 3-(4-isopropylphenyl)-4,4,5-trimethyl-1-phenyl-4,5-dihydro-1H-pyrazole (3e)

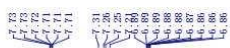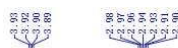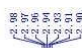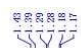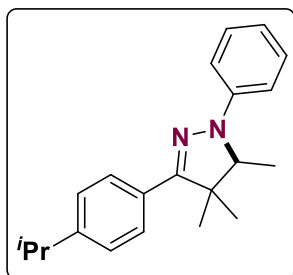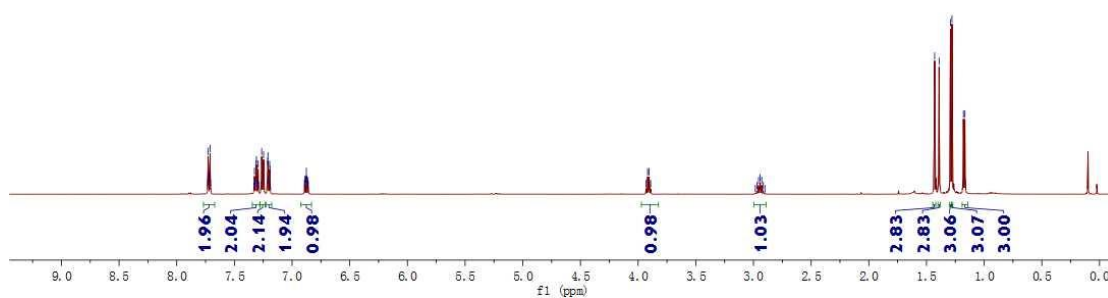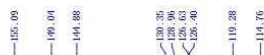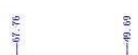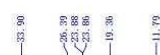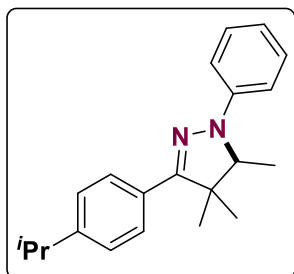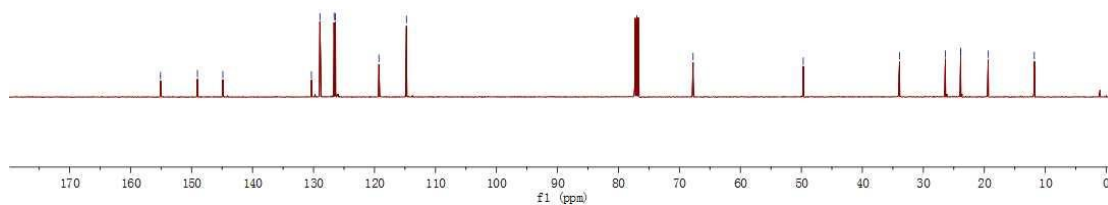

# 1-(4-chlorophenyl)-4,4,5-trimethyl-3-phenyl-4,5-dihydro-1H-pyrazole (3f)

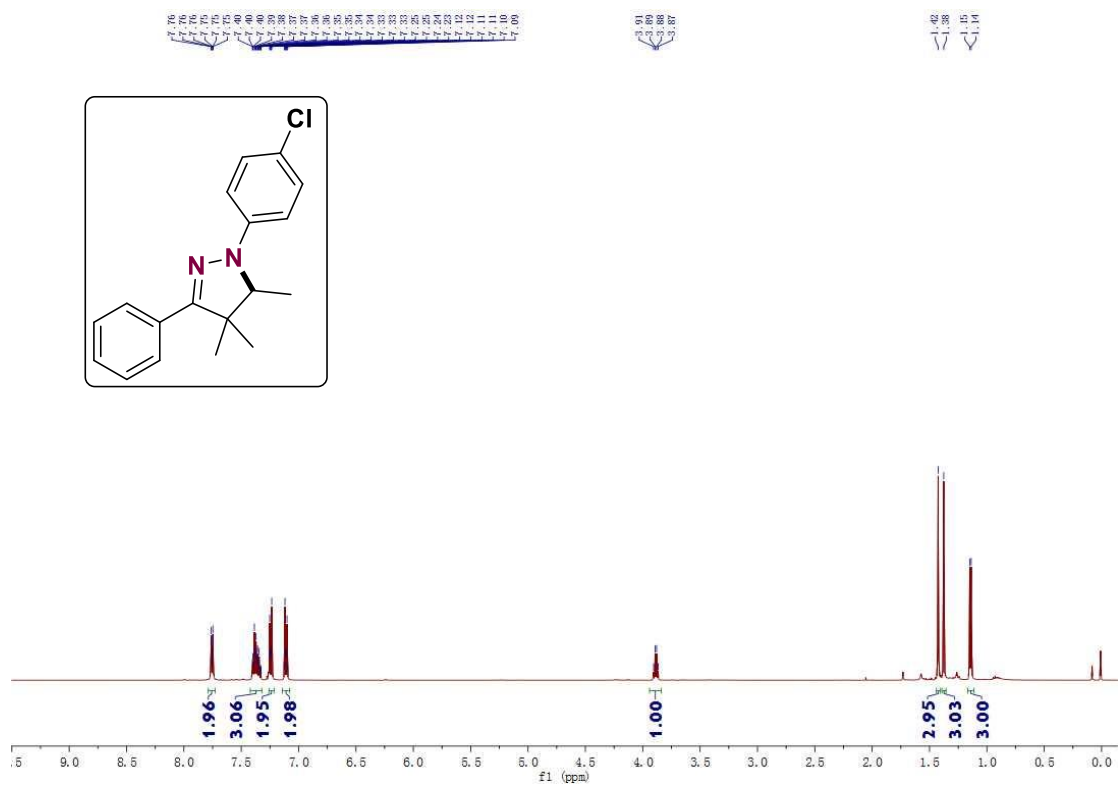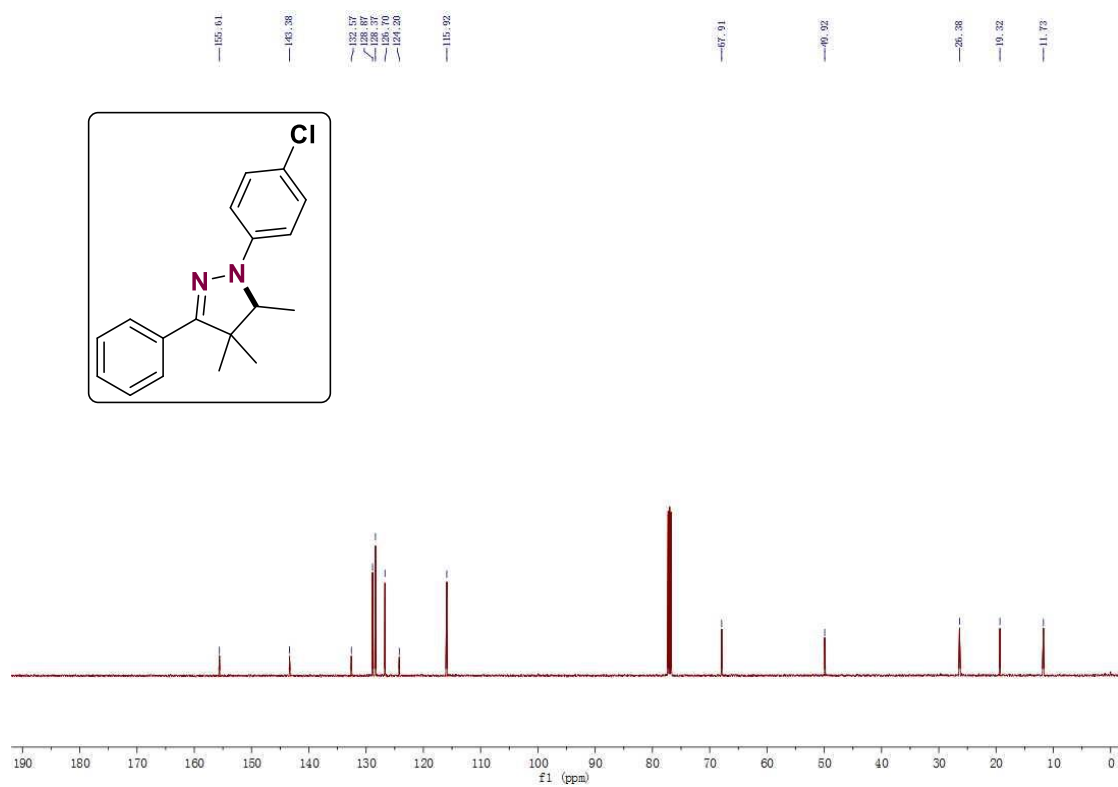

# 1-(4-bromophenyl)-4,4,5-trimethyl-3-phenyl-4,5-dihydro-1H-pyrazole (3g)

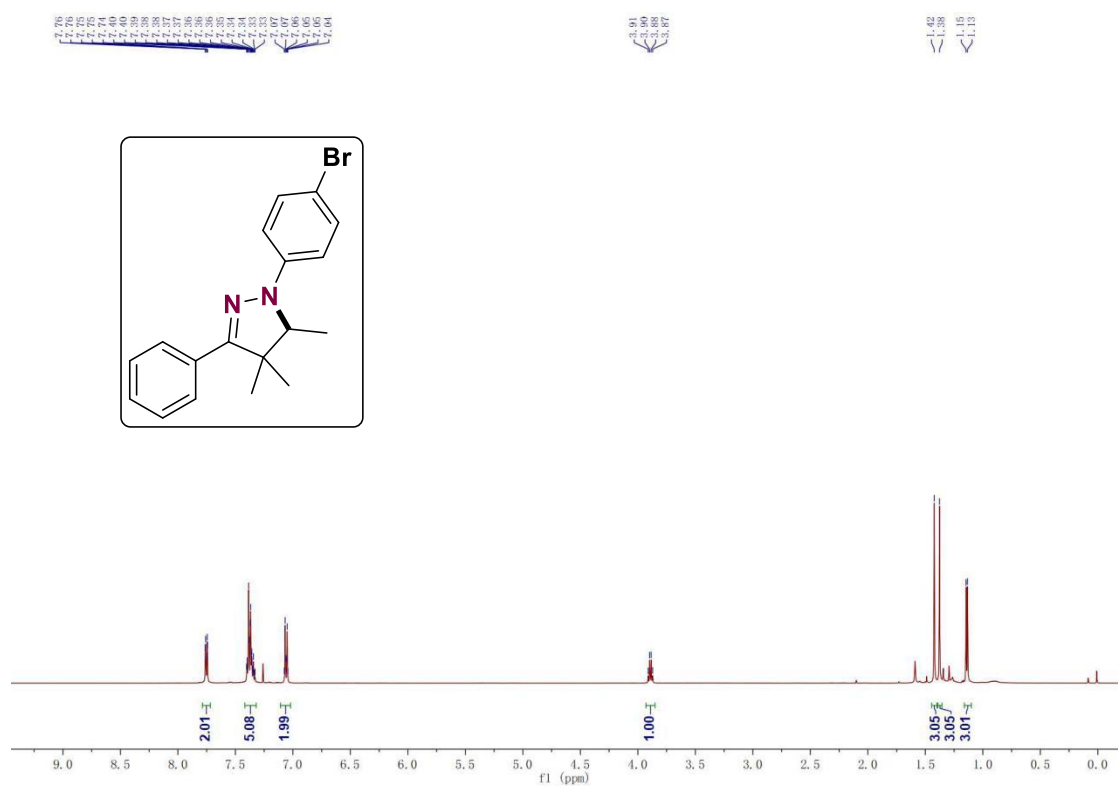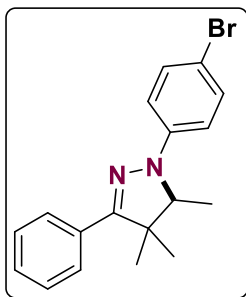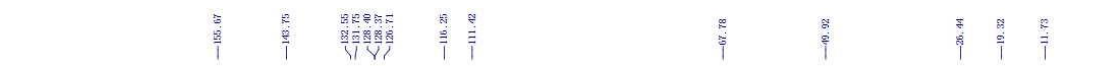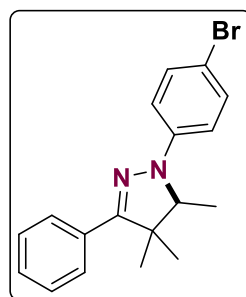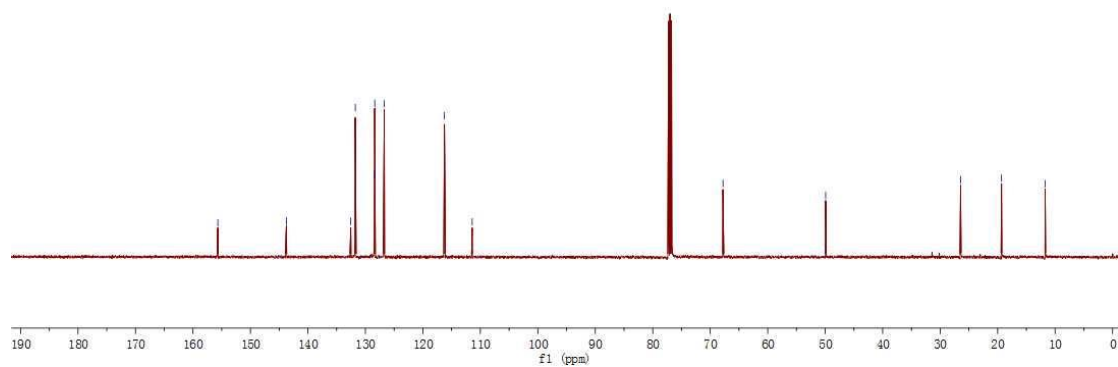

Supplement: c9cc04039k1.pdf [file c9cc04039k1.pdf]
